# Supplementary material for: Reprogramming of arachidonic acid metabolism using α-terpineol to alleviate asthma: insights from metabolomics
Source: Royal Society of Chemistry journal article supplement (doi:10.1039/d3fo04078j), 2024-01-01

# Reprogrammed arachidonic acid metabolism by $\alpha$ -terpineol to alleviate asthma: insights from metabolomics

Ying Rong<sup>1</sup>, Fanglin Liu<sup>1</sup>, Hui Zhou<sup>1</sup>, Tong Yu<sup>1</sup>, Zhaolong Qin<sup>1</sup>,  
Qianwen Cao<sup>1</sup>, Luyao Liu<sup>1</sup>, Xiaoge Ma<sup>1</sup>, Lingbo Qu<sup>1</sup>, Peirong Xu<sup>1</sup>,  
Xinglin Liao<sup>3</sup>, Qiman Jiang<sup>3</sup>, Nan Zhang<sup>2\*</sup>, Xia Xu<sup>1\*</sup>

<sup>1</sup> Department of Medical Analysis, School of pharmaceutical science,  
Zhengzhou University, Zhengzhou, Henan, 450001

<sup>2</sup> Department of Pharmaceutics, School of pharmaceutical science,  
Zhengzhou University, Zhengzhou, Henan, 450001

<sup>3</sup> Nanyang LANHAISENYUAN Medical technology ltd.,CO. Nanyang,  
Henan, 473000

\*Co-corresponding Authors:

1. Xia Xu, Department of Medical Analysis, School of pharmaceutical science, Zhengzhou University, Zhengzhou, Henan, 450001, P. R. China

Tel.: 86-0371-67781911; E-mail: xuxia@zzu.edu.cn

2. Nan Zhang, Department of Pharmaceutics, School of pharmaceutical science, Zhengzhou University, Zhengzhou, Henan, 450001, P. R. China

Tel.: 86-0371-67781911; E-mail: nanzhang@zzu.edu.cn

## **Supplementary material**

**Table S1** Major differential compounds and change trend in mouse lung tissue samples.

**Table S2** Major differential compounds and their specific information in mouse lung tissue samples.

**Table S3** Major differential compounds and change trend in mouse serum samples.

**Table S4** Major differential compounds and their specific information in mouse serum samples.

**Table S5** Summary of results of pathway analysis of differential metabolites in lung tissue samples.

**Table S6** Results of enrichment analysis of major differential compounds in mouse lung tissue samples.

**Table S7** Summary of results of pathway analysis of differential metabolites in serum samples.

**Table S8** Results of enrichment analysis of major differential compounds in mouse serum samples.

**Fig S1** The representative total ion chromatograms (TICs) of lung tissue samples in both positive (ESI<sup>+</sup>) and negative (ESI<sup>-</sup>) ion modes.

**Fig S2** The representative total ion chromatograms (TICs) of serum samples in both positive (ESI<sup>+</sup>) and negative (ESI<sup>-</sup>) ion modes.

**Fig S3** The PCA analysis of QCs samples of lung tissue and serum

samples in both positive (ESI<sup>+</sup>) and negative (ESI<sup>-</sup>) ion modes.

**Fig S4** MS/MS spectrum of the differential metabolites in lung tissues detected by UPLC-MS/MS.

**Fig S5** MS/MS spectra of different metabolites in serum detected by UPLC-MS/MS.

**Table S1** Major differential compounds and change trend in mouse lung tissue samples.

| Differential compound | Rt (min) | m/z      | Formula                   | Adducts                                  | Ion Mode         | Fold change |           |
|-----------------------|----------|----------|---------------------------|------------------------------------------|------------------|-------------|-----------|
|                       |          |          |                           |                                          |                  | M vs. C     | Ter vs. M |
| Arachidonic acid      | 19.07    | 303.2330 |                           | [M-H]-<br>[M-H]-                         | ESI <sup>-</sup> | 1.63 ↑      | 0.50 ↓    |
| LTB4                  | 16.61    | 335.2228 |                           | [M-H]-<br>[M+H] <sup>+</sup>             | ESI <sup>-</sup> | 1.64 ↑      | 0.81 ↓    |
| LTD4                  | 19.20    | 495.2534 |                           | [M+H] <sup>+</sup><br>[M+H] <sup>+</sup> | ESI <sup>-</sup> | 2.46 ↑      | 0.28 ↓    |
| 5-HPETE               | 9.72     | 337.2373 | C20H32O2<br>C20H32O4      | [M+H] <sup>+</sup><br>[M+H] <sup>+</sup> | ESI <sup>+</sup> | 1.64 ↑      | 0.57 ↓    |
| L-Tryptophan          | 3.68     | 205.0972 | C25H40N2O6S<br>C20H32O4   | [M-H]-<br>[M-H]-                         | ESI <sup>+</sup> | 1.38 ↑      | 0.87 ↓    |
| Hypoxanthine          | 1.41     | 137.0458 | C11H12N2O2<br>C5H4N4O     | [M+H] <sup>+</sup><br>[M+H] <sup>+</sup> | ESI <sup>+</sup> | 1.86 ↑      | 0.42 ↓    |
| Ornithine             | 0.85     | 133.0972 | C5H12N2O2<br>C6H9N3O2     | [M-H]-<br>[M-H]-                         | ESI <sup>+</sup> | 3.60 ↑      | 0.75 ↓    |
| Histidine             | 0.86     | 156.0768 | C20H30O2<br>C9H12N2O6     | [M-H]-<br>[M+H] <sup>+</sup>             | ESI <sup>+</sup> | 1.67 ↑      | 0.81 ↓    |
| Abietic acid          | 1.03     | 301.2173 | C4H4N2O2<br>C20H32O5      | [M+H] <sup>+</sup><br>[M+H] <sup>+</sup> | ESI <sup>-</sup> | 1.74 ↑      | 0.72 ↓    |
| Uridine               | 1.24     | 243.0623 | C20H32O3<br>C18H30O2      | [M+H] <sup>+</sup><br>[M+H] <sup>+</sup> | ESI <sup>-</sup> | 2.16 ↑      | 0.57 ↓    |
| Uracil                | 1.40     | 113.0346 | C18H32O2<br>C10H12N2O3    | [M+H] <sup>+</sup><br>[M+H] <sup>+</sup> | ESI <sup>+</sup> | 1.62 ↑      | 0.86 ↓    |
| LXA4                  | 8.55     | 353.2322 | C5H4N4O2<br>C10H13N5O4    | [M+H] <sup>+</sup><br>[M-H]-             | ESI <sup>+</sup> | 0.64 ↓      | 1.38 ↑    |
| 5-HETE                | 17.52    | 319.2279 | C10H12N4O5<br>C10H17N3O6S | [M+H] <sup>+</sup><br>[M-H]-             | ESI <sup>-</sup> | 0.82 ↓      | 1.37 ↑    |
| α-Linolenic acid      | 18.66    | 277.2173 | C5H7NO3<br>C5H9N3         |                                          | ESI <sup>-</sup> | 0.89 ↓      | 1.24 ↑    |
| Linoleic acid         | 19.02    | 279.2330 | C5H5N5<br>C5H4N4O3        |                                          | ESI <sup>-</sup> | 0.79 ↓      | 1.32 ↑    |
| Kynurenine            | 2.15     | 209.0921 | C20H32O5<br>C20H32O5      |                                          | ESI <sup>+</sup> | 0.76 ↓      | 1.64 ↑    |
| Xanthine              | 1.40     | 153.0407 |                           |                                          | ESI <sup>+</sup> | 0.74 ↓      | 1.18 ↑    |
| Adenosine             | 1.41     | 268.1040 |                           |                                          | ESI <sup>+</sup> | 0.81 ↓      | 1.23 ↑    |
| Inosine               | 1.46     | 269.0880 |                           |                                          | ESI <sup>+</sup> | 0.78 ↓      | 1.23 ↑    |

|                   |       |          |                  |        |        |
|-------------------|-------|----------|------------------|--------|--------|
| Glutathione       | 7.76  | 308.0911 | ESI <sup>+</sup> | 0.18 ↓ | 2.94 ↑ |
| Pyroglutamic acid | 1.41  | 130.0499 | ESI <sup>+</sup> | 0.48 ↓ | 1.29 ↑ |
| Histamine         | 0.81  | 112.0869 | ESI <sup>+</sup> | 0.69 ↓ | 1.12 ↑ |
|                   |       |          |                  | 0.65 ↓ | 1.56 ↑ |
| Adenine           | 3.01  | 136.0618 | ESI <sup>+</sup> | 2.18 ↑ | 0.54 ↓ |
| Uric acid         | 0.88  | 167.0210 | ESI <sup>-</sup> |        |        |
| PGD2              | 8.55  | 353.2322 | ESI <sup>+</sup> | 0.62 ↓ | 1.45 ↑ |
| TXA2              | 12.92 | 351.2178 | ESI <sup>-</sup> | 1.89 ↑ | 0.43 ↓ |

Rt represents the retention time of the compound.

**Table S2** Major differential compounds in mouse lung tissue samples and their specific information.

| Differential compound | Annotation level | CV in QCs (%) | P-Value |          | Corrected P-value |          | Biochemical class                 |
|-----------------------|------------------|---------------|---------|----------|-------------------|----------|-----------------------------------|
|                       |                  |               | M vs C  | Ter vs M | M vs C            | Ter vs M |                                   |
| Arachidonic acid      | Level 2          | 13.6          | <0.01   | <0.01    | 0.05              | 0.02     | Fatty acids                       |
| LTB4                  | Level 2          | 19.7          | 0.01    | 0.02     | 0.05              | 0.22     | Unsaturated acid                  |
| LTD4                  | Level 2          | 15.4          | <0.01   | <0.01    | 0.01              | <0.01    | Unsaturated acid                  |
| 5-HPETE               | Level 2          | 13.5          | 0.02    | 0.02     | 0.05              | 0.21     | Hydroperoxyeicosatetraenoic acids |
| L-Tryptophan          | Level 2          | 18.9          | <0.01   | 0.01     | <0.01             | 0.11     | Alpha-amino acid                  |
| Hypoxanthine          | Level 2          | 8.9           | <0.01   | <0.01    | 0.38              | 0.38     | Purines                           |
| Ornithine             | Level 2          | 19.9          | <0.01   | 0.02     | <0.01             | 0.02     | L-alpha-amino acids               |
| Histidine             | Level 2          | 6.7           | <0.01   | 0.02     | <0.01             | 0.02     | Alpha-amino acid                  |
| Abietic acid          | Level 2          | 4.2           | 0.03    | 0.01     | 0.05              | 0.17     | Diterpenoids                      |
| Uridine               | Level 2          | 17.0          | <0.01   | 0.01     | <0.01             | 0.59     | Pyrimidine nucleosides            |

|                          |         |      |       |       |       |      |                                |
|--------------------------|---------|------|-------|-------|-------|------|--------------------------------|
| Uracil                   | Level 2 | 18.3 | 0.03  | 0.03  | 0.04  | 0.38 | Pyrimidones                    |
| LXA4                     | Level 2 | 12.1 | <0.01 | 0.03  | <0.01 | 0.05 | Eicosanoid chemical mediators  |
| 5-HETE                   | Level 2 | 19.9 | 0.03  | 0.01  | 0.31  | 0.05 | Eicosanoid                     |
| $\alpha$ -Linolenic acid | Level 2 | 13.5 | 0.05  | <0.01 | 0.59  | 0.03 | Omega-3 fatty acid             |
| Linoleic acid            | Level 2 | 17.3 | 0.05  | 0.03  | 0.05  | 0.03 | Omega-6 fatty acid             |
| Kynurenine               | Level 2 | 16.4 | 0.04  | 0.04  | 0.44  | 0.04 | Alkyl-phenylketone             |
| Xanthine                 | Level 2 | 12.0 | <0.01 | 0.01  | 0.01  | 0.19 | Xanthines                      |
| Adenosine                | Level 2 | 19.8 | 0.05  | 0.01  | 0.05  | 0.12 | Nucleoside                     |
| Inosine                  | Level 2 | 13.4 | 0.04  | 0.10  | 0.04  | 0.10 | Purine nucleosides             |
| Glutathione              | Level 2 | 18.8 | <0.01 | 0.03  | <0.01 | 0.03 | Tripeptide                     |
| Pyroglutamic acid        | Level 2 | 18.8 | <0.01 | 0.19  | <0.01 | 0.19 | Amino acid derivative          |
| Histamine                | Level 2 | 19.4 | <0.01 | 0.28  | <0.01 | 0.28 | Amine                          |
| Adenine                  | Level 2 | 10.1 | 0.02  | 0.01  | 0.03  | 0.19 | 6-Aminopurines                 |
| Uric acid                | Level 2 | 19.5 | <0.01 | 0.01  | <0.01 | 0.02 | Heterocyclic purine derivative |
| PGD2                     | Level 2 | 16.2 | 0.04  | 0.02  | 0.04  | 0.24 | Prostaglandin                  |
| TXA2                     | Level 2 | 17.7 | <0.01 | 0.01  | 0.01  | 0.02 | Thromboxane                    |

**Table S3** Major differential compounds and change trend in mouse serum samples.

| Differential compound | Rt (min) | <i>m/z</i> | Formula                                                       | Adducts                                  | Ion Mode         | Fold change |           |
|-----------------------|----------|------------|---------------------------------------------------------------|------------------------------------------|------------------|-------------|-----------|
|                       |          |            |                                                               |                                          |                  | M vs. C     | Ter vs. M |
| Arginine              | 0.84     | 175.1190   | C <sub>6</sub> H <sub>14</sub> N <sub>4</sub> O <sub>2</sub>  | [M+H] <sup>+</sup><br>[M+H] <sup>+</sup> | ESI <sup>+</sup> | 1.32 ↑      | 0.60 ↓    |
| Kynurenine            | 2.11     | 209.0921   | C <sub>10</sub> H <sub>12</sub> N <sub>2</sub> O <sub>3</sub> | [M+H] <sup>+</sup><br>[M+H] <sup>+</sup> | ESI <sup>+</sup> | 1.22 ↑      | 0.60 ↓    |
| Glutamate             | 1.06     | 148.0604   | C <sub>5</sub> H <sub>9</sub> NO <sub>4</sub>                 | [M+H] <sup>+</sup><br>[M+H] <sup>+</sup> | ESI <sup>+</sup> | 1.22 ↑      | 0.42 ↓    |
| Uric acid             | 1.33     | 169.0356   | C <sub>5</sub> H <sub>4</sub> N <sub>4</sub> O <sub>3</sub>   | [M+H] <sup>+</sup><br>[M-H] <sup>-</sup> | ESI <sup>+</sup> | 1.83 ↑      | 0.43 ↓    |
| LTA4                  | 11.13    | 319.2267   | C <sub>20</sub> H <sub>30</sub> O <sub>3</sub>                | [M-H] <sup>-</sup><br>[M+H] <sup>+</sup> | ESI <sup>+</sup> | 2.50 ↑      | 0.45 ↓    |
| Histidine             | 0.82     | 156.0768   | C <sub>6</sub> H <sub>9</sub> N <sub>3</sub> O <sub>2</sub>   | [M+H] <sup>+</sup><br>[M+H] <sup>+</sup> | ESI <sup>+</sup> | 1.30 ↑      | 0.36 ↓    |

|                  |       |          |                                                               |                    |                  |        |        |
|------------------|-------|----------|---------------------------------------------------------------|--------------------|------------------|--------|--------|
| Histamine        | 0.79  | 112.0869 | C <sub>5</sub> H <sub>9</sub> N <sub>3</sub>                  | [M-H] <sup>-</sup> | ESI <sup>+</sup> | 1.30 ↑ | 0.34 ↓ |
| Arachidonic acid | 19.04 | 303.2330 | C <sub>20</sub> H <sub>32</sub> O <sub>2</sub>                | [M-H] <sup>-</sup> | ESI <sup>-</sup> | 2.03 ↑ | 0.33 ↓ |
| Uridine          | 1.22  | 243.0623 | C <sub>9</sub> H <sub>12</sub> N <sub>2</sub> O <sub>6</sub>  | [M+H] <sup>+</sup> | ESI <sup>-</sup> | 1.66 ↑ | 0.45 ↓ |
| Xanthine         | 1.34  | 153.0407 | C <sub>5</sub> H <sub>4</sub> N <sub>4</sub> O <sub>2</sub>   |                    | ESI <sup>+</sup> | 0.36 ↓ | 6.60 ↑ |
| Tryptophan       | 3.67  | 205.0972 | C <sub>11</sub> H <sub>12</sub> N <sub>2</sub> O <sub>2</sub> |                    | ESI <sup>+</sup> | 0.71 ↓ | 1.38 ↑ |
| 5-HPETE          | 9.72  | 337.2373 | C <sub>20</sub> H <sub>32</sub> O <sub>4</sub>                |                    | ESI <sup>+</sup> | 0.39 ↓ | 2.37 ↑ |
| α-Linolenic acid | 18.50 | 277.2173 | C <sub>18</sub> H <sub>30</sub> O <sub>2</sub>                |                    | ESI <sup>-</sup> | 0.18 ↓ | 3.98 ↑ |
| linoleic acid    |       | 279.2330 | C <sub>18</sub> H <sub>32</sub> O <sub>2</sub>                |                    |                  | 0.62 ↓ | 1.89 ↑ |
| Valine           | 18.97 | 118.0863 | C <sub>5</sub> H <sub>11</sub> NO <sub>2</sub>                |                    | ESI <sup>-</sup> |        |        |
|                  | 1.35  |          |                                                               |                    | ESI <sup>+</sup> | 0.57 ↓ | 2.05 ↑ |

Rt represents the retention time of the compound.

**Table S4** Major differential compounds in mouse serum samples and their specific information.

| Differential compound    | Annotation level | CV in QCs (%) | P-Value |          | Corrected P-value |          | Biochemical class                 |
|--------------------------|------------------|---------------|---------|----------|-------------------|----------|-----------------------------------|
|                          |                  |               | M vs C  | Ter vs M | M vs C            | Ter vs M |                                   |
| Arginine                 | Level 2          | 5.2           | <0.01   | 0.02     | 0.04              | 0.05     | L-alpha-amino acids               |
| Kynurenine               | Level 2          | 19.0          | 0.01    | 0.12     | 0.05              | 0.19     | Alkyl-phenylketone                |
| Glutamate                | Level 2          | 17.9          | 0.03    | <0.01    | 0.12              | <0.01    | Alpha-amino acid                  |
| Uric acid                | Level 2          | 9.3           | <0.01   | <0.01    | 0.04              | 0.06     | Heterocyclic purine derivative    |
| LTA4                     | Level 2          | 16.3          | <0.01   | <0.01    | <0.01             | <0.01    | Leukotrienes                      |
| Histidine                | Level 2          | 19.3          | <0.01   | <0.01    | 0.05              | <0.01    | Alpha-amino acid                  |
| Histamine                | Level 2          | 15.5          | <0.01   | 0.02     | 0.18              | 0.02     | Amine                             |
| Arachidonic acid         | Level 2          | 20.0          | <0.01   | 0.02     | <0.01             | 0.02     | Fatty acids                       |
| Uridine                  | Level 2          | 19.5          | <0.01   | 0.24     | 0.04              | 0.24     | Pyrimidine nucleosides            |
| Xanthine                 | Level 2          | 19.6          | <0.01   | 0.01     | <0.01             | 0.01     | Xanthines                         |
| Tryptophan               | Level 2          | 7.3           | <0.01   | 0.01     | 0.05              | 0.01     | Alpha-amino acid                  |
| 5-HPETE                  | Level 2          | 12.8          | <0.01   | 0.03     | <0.01             | 0.03     | Hydroperoxyeicosatetraenoic acids |
| $\alpha$ -Linolenic acid | Level 2          | 13.2          | <0.01   | 0.01     | <0.01             | 0.01     | Omega-3 fatty acid                |
| linoleic acid            | Level 2          | 19.2          | <0.01   | <0.01    | 0.03              | 0.08     | Omega-6 fatty acid                |
| Valine                   | Level 2          | 19.5          | <0.01   | <0.01    | <0.01             | <0.01    | Alpha-amino acid                  |

**Table S5** Summary of results of pathway analysis of differential metabolites in lung tissue.



| <b>Pathway Name</b>                     | <b>Match Status</b> | <b>p</b>  | <b>FDR</b> | <b>Impact</b> |
|-----------------------------------------|---------------------|-----------|------------|---------------|
| Arachidonic acid metabolism             | 7/36                | 5.1766E-7 | 4.3484E-7  | 0.4644        |
| Purine metabolism                       | 6/65                | 0.2004E-4 | 0.010454   | 0.00754       |
| Glutathione metabolism                  | 3/28                | 0.0082928 | 0.2322     | 0.26305       |
| Biosynthesis of unsaturated fatty acids | 3/30                | 0.016662  | 0.34989    | 0.0           |
| Histidine metabolism                    | 2/16                | 0.024162  | 0.40592    | 0.40983       |
| beta-Alanine metabolism                 | 2/21                | 0.040341  | 0.56477    | 0.0           |
| Linoleic acid metabolism                | 1/5                 | 0.075153  | 0.90183    | 1.0           |

**Table S6** Results of enrichment analysis of major differential compounds in mouse lung tissue samples.

| <b>Metabolite Set</b>                        | <b>Total</b> | <b>Hits</b> | <b>Expect</b> | <b>P value</b> | <b>FDR</b> |
|----------------------------------------------|--------------|-------------|---------------|----------------|------------|
| Arachidonic acid metabolism                  | 69           | 8           | 1.62          | 8.76E-5        | 0.00858    |
| Purine metabolism                            | 74           | 6           | 1.73          | 0.00549        | 0.269      |
| Alpha-linolenic and linoleic acid metabolism | 19           | 3           | 0.445         | 0.00858        | 0.28       |
| Glutathione metabolism                       | 21           | 2           | 0.492         | 0.0843         | 1.0        |

**Table S7** Summary of results of pathway analysis of differential metabolites in serum.

| <b>Pathway Name</b>                     | <b>Match Status</b> | <b>P</b>  | <b>FDR</b> | <b>Impact</b> |
|-----------------------------------------|---------------------|-----------|------------|---------------|
| Aminoacyl-tRNA biosynthesis             | 5/48                | 5.4905E-5 | 0.0046121  | 0.0           |
| Histidine metabolism                    | 3/16                | 3.8127E-4 | 0.016013   | 0.40983       |
| Biosynthesis of unsaturated fatty acids | 3/36                | 0.0043244 | 0.090813   | 0.0           |
| Arachidonic acid metabolism             | 3/36                | 0.0043244 | 0.090813   | 0.49613       |
| Arginine biosynthesis                   | 2/14                | 0.0074414 | 0.12502    | 0.19289       |
| Linoleic acid metabolism                | 1/5                 | 0.04752   | 0.48448    | 1.0           |
| Arginine and proline metabolism         | 2/38                | 0.050279  | 0.48448    | 0.14386       |

**Table S8** Results of enrichment analysis of major differential compounds in mouse serum samples.

| <b>Metabolite Set</b>                        | <b>Total</b> | <b>Hits</b> | <b>Expect</b> | <b>P value</b> | <b>FDR</b> |
|----------------------------------------------|--------------|-------------|---------------|----------------|------------|
| Alpha-linolenic and linoleic acid metabolism | 19           | 3           | 0.278         | 0.00214        | 0.21       |
| Arachidonic acid metabolism                  | 69           | 4           | 1.01          | 0.0146         | 0.717      |
| Histidine metabolism                         | 43           | 3           | 0.63          | 0.0221         | 0.721      |
| Tryptophan metabolism                        | 60           | 3           | 0.879         | 0.0526         | 0.884      |
| Methylhistidine Metabolism                   | 4            | 1           | 0.0586        | 0.0574         | 0.884      |
| Urea cycle                                   | 29           | 2           | 0.425         | 0.0647         | 0.884      |
| Ammonia Recycling                            | 32           | 2           | 0.469         | 0.0771         | 0.884      |

**Fig S1** The representative total ion chromatograms (TICs) of lung tissue samples in ESI<sup>+</sup> and ESI<sup>-</sup> modes.

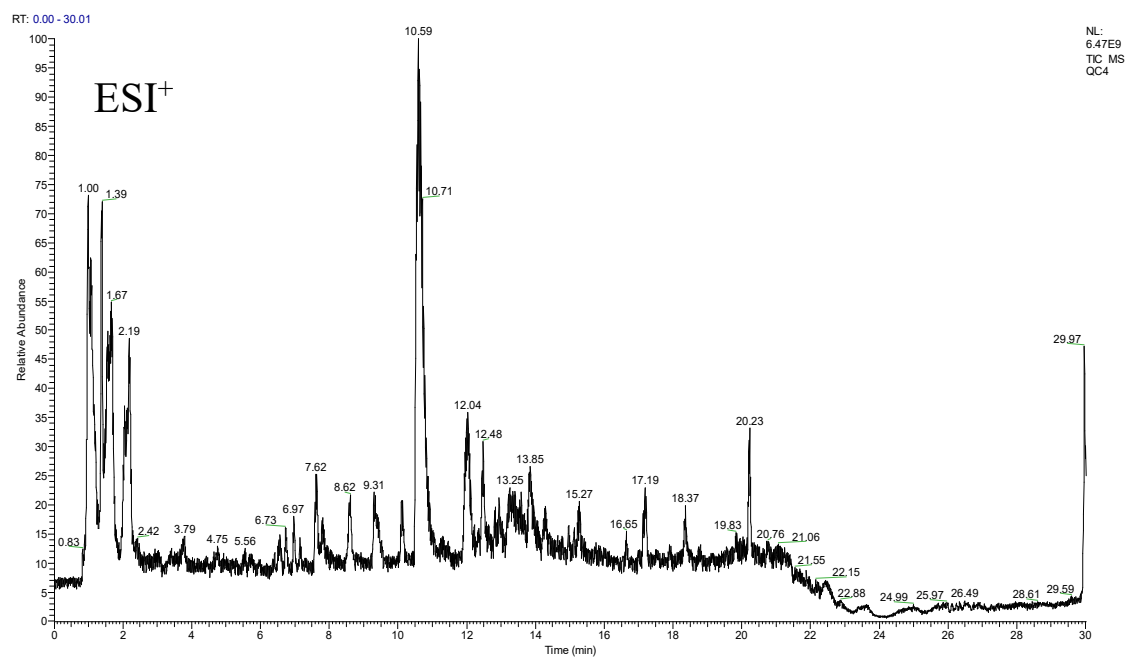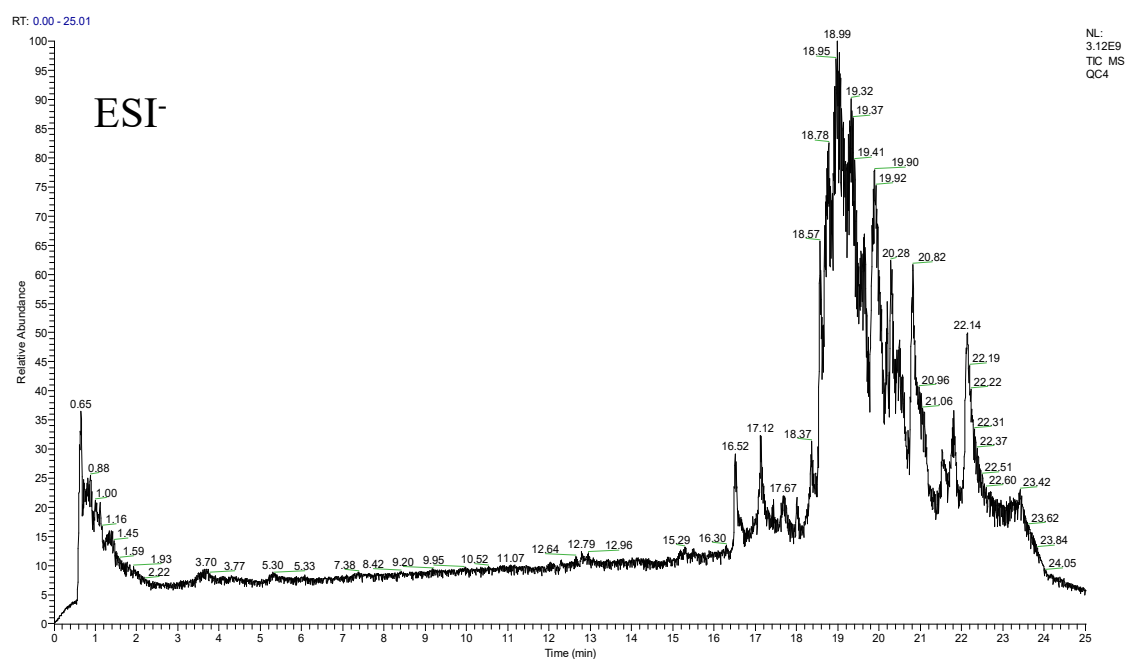

**Fig S2** The representative total ion chromatograms (TICs) of serum samples in ESI<sup>+</sup> and ESI<sup>-</sup> modes.

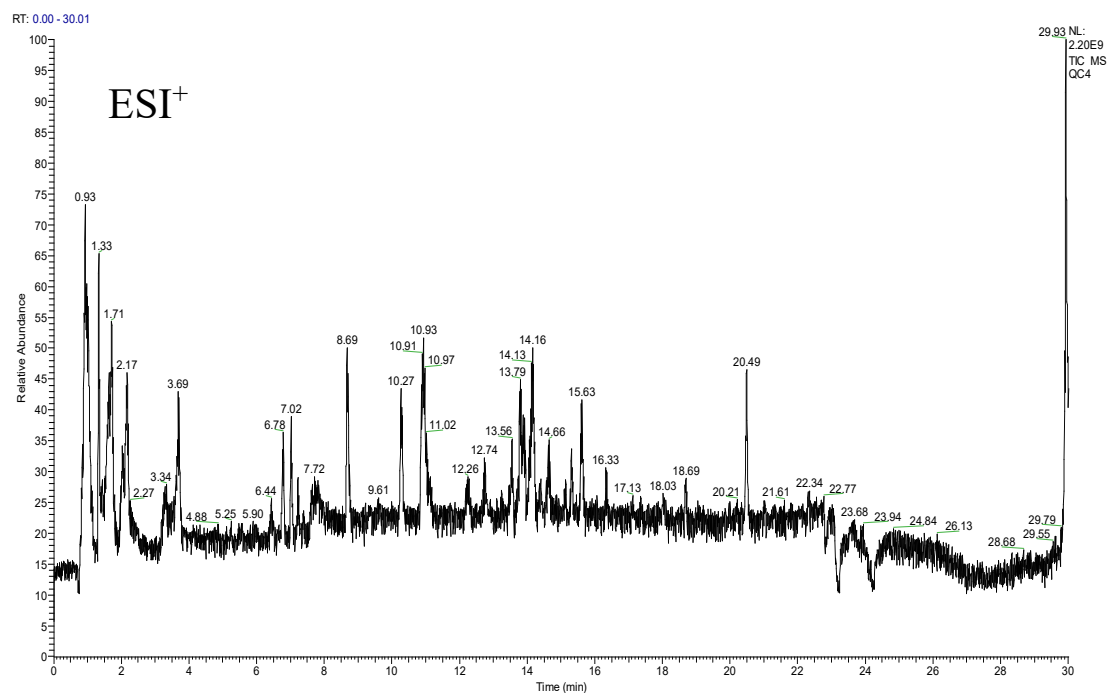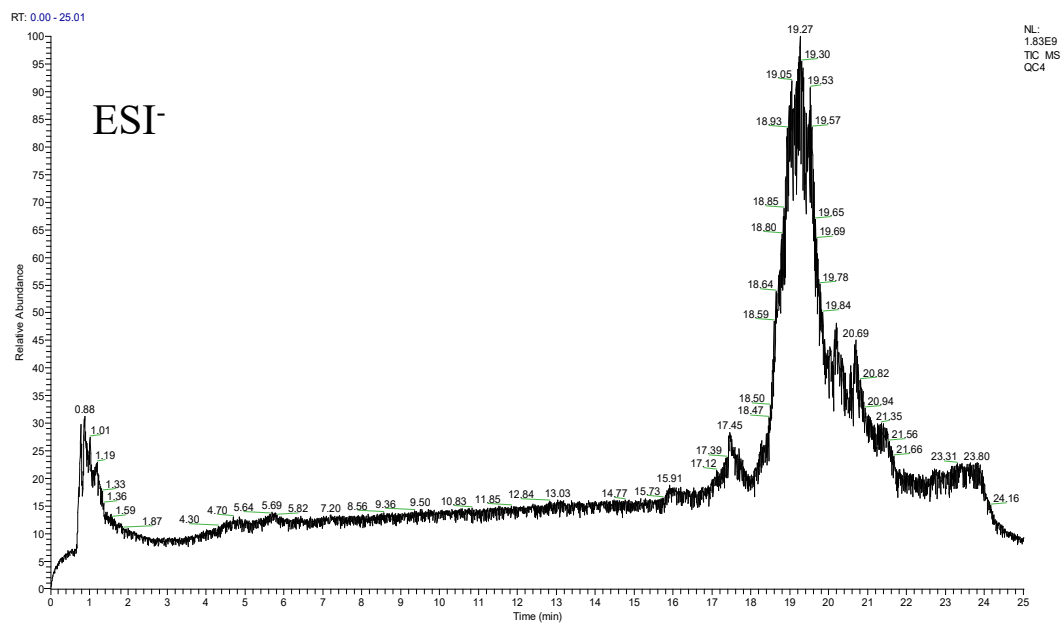

**Fig S3** The PCA analysis of QCs samples of lung tissue and serum samples in both positive (ESI<sup>+</sup>) and negative (ESI<sup>-</sup>) ion modes.

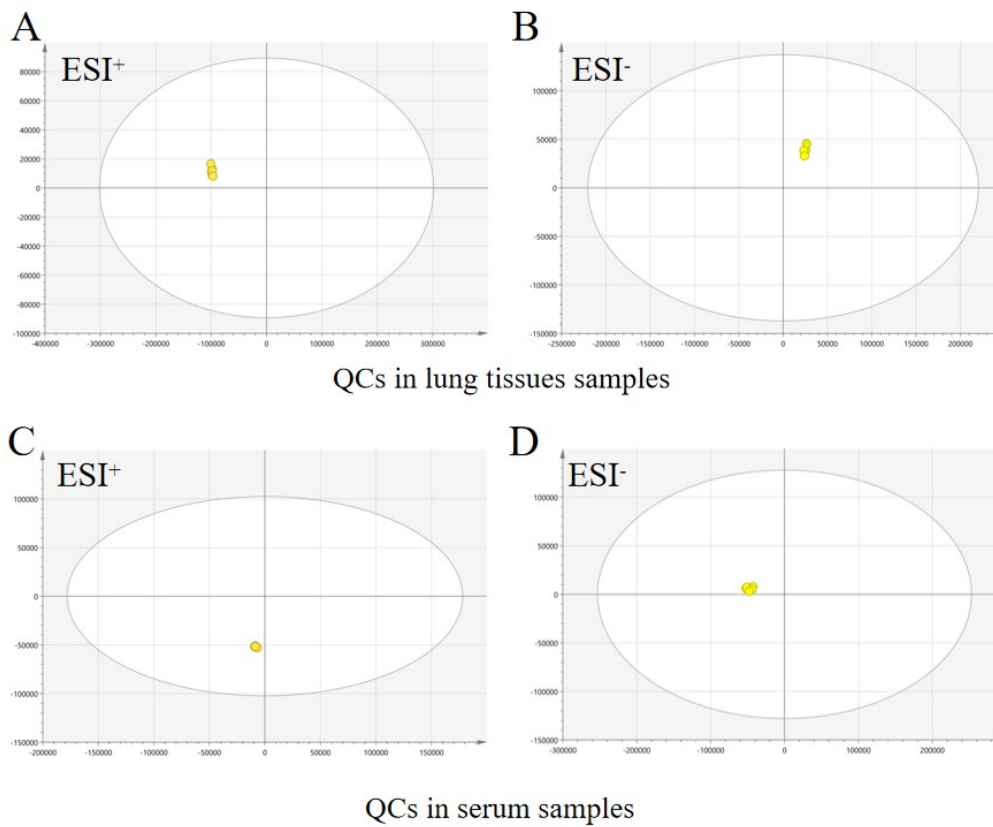

**Fig S4** MS/MS spectra of different metabolites in lung tissues detected by UPLC-MS/MS.

# 1.Arachidonic Acid (AA)

[M-H] :303.2329

MS/MS spectrum of arachidonic acid detected in mouse lung tissue

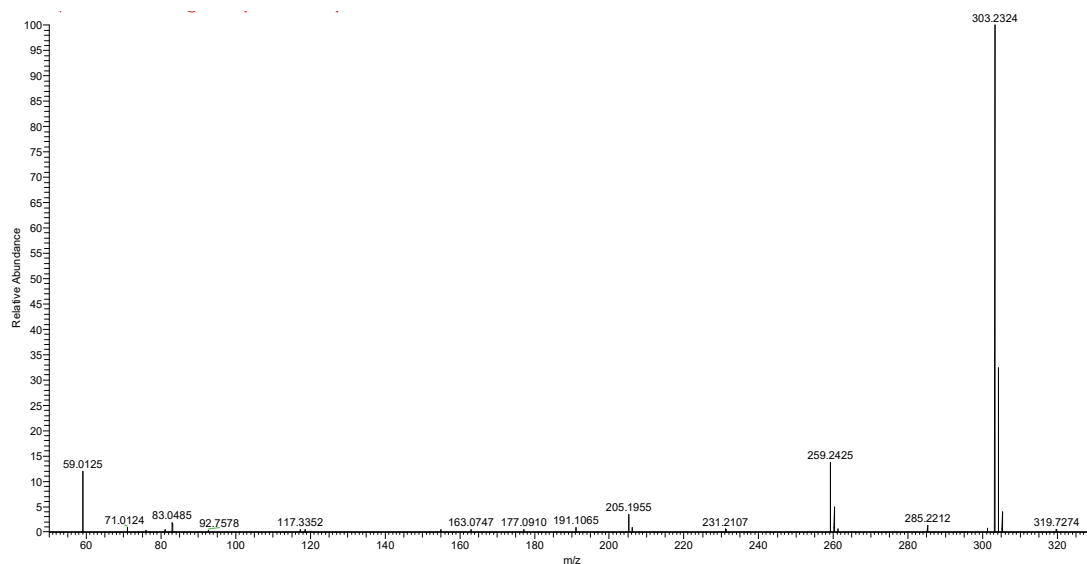

MS/MS spectrum of arachidonic acid from HMDB

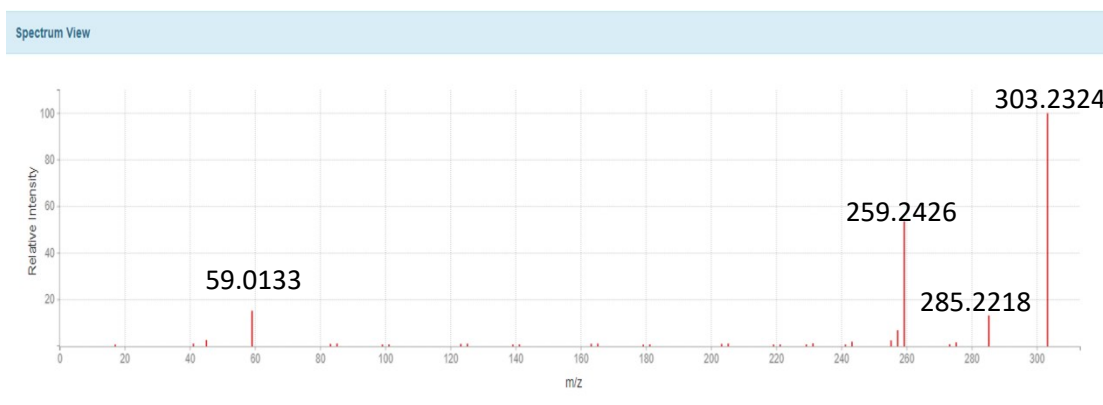

MS/MS spectrum of arachidonic acid from MassBank

# Arachidonic acid; LC-ESI-QTOF; MS2; CE:20 eV; [M-H]-

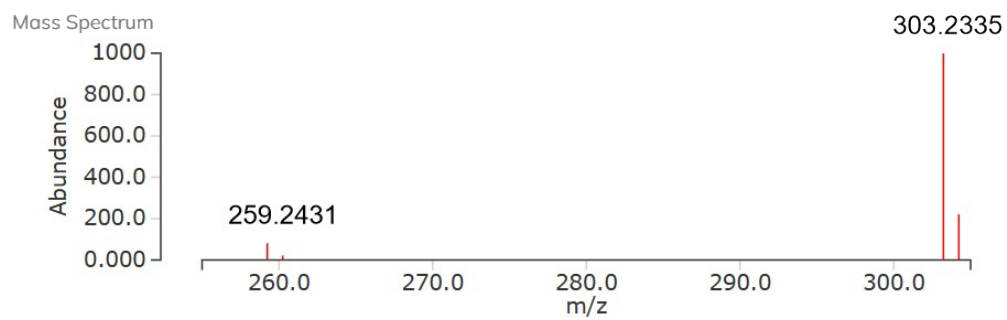

## 2.Thromboxane A2 (TXA2)



**[M-H] :351.2176**

MS/MS spectrum of TXA2 detected in mouse lung tissue

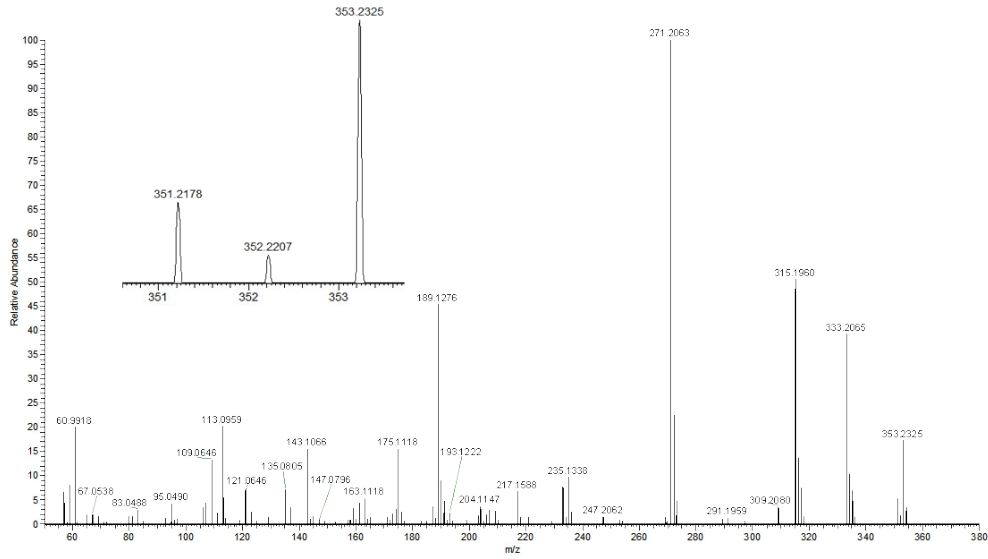

MS/MS spectrum of TXA2 from HMDB

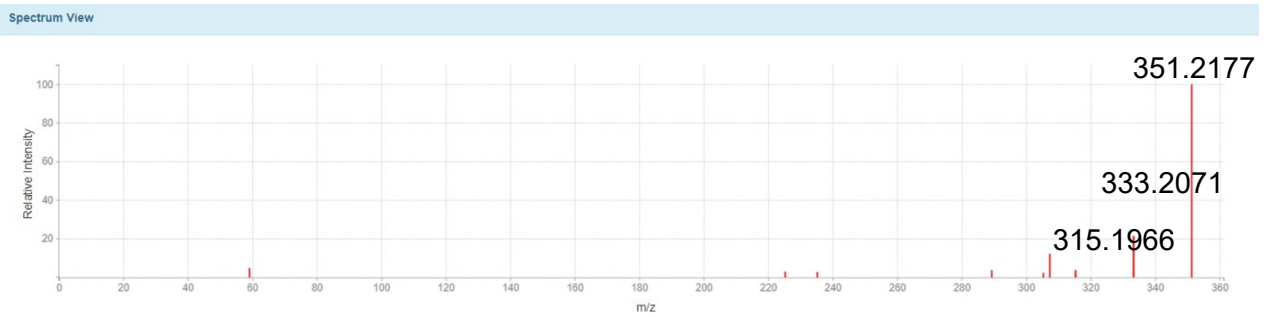

**3.LTB4**

**[M-H] :335.2227**

MS/MS spectrum of LTB4 detected in mouse lung tissue

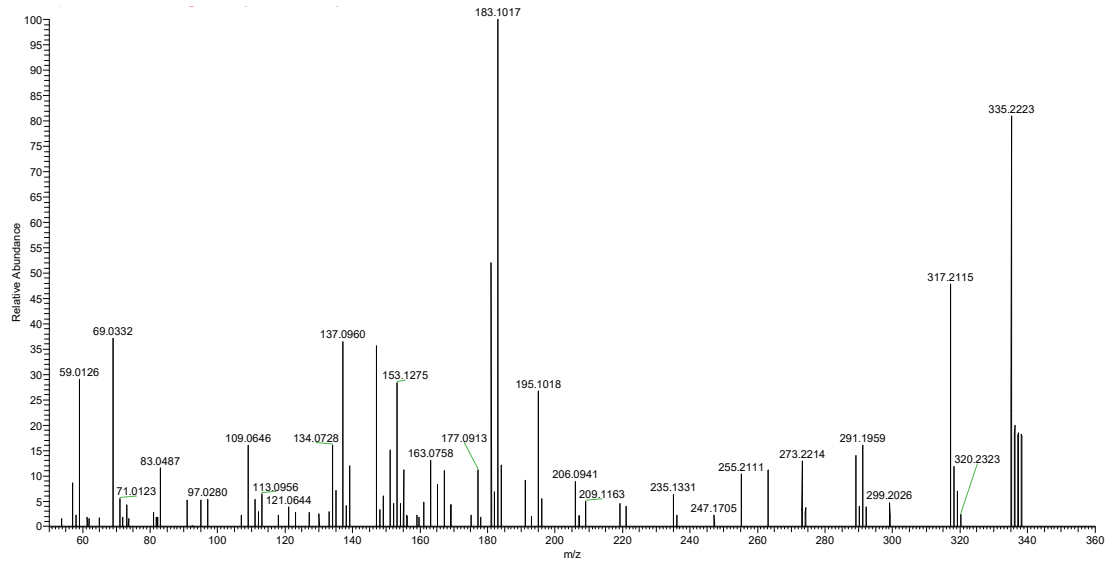

MS/MS spectrum of LTB4 from HMDB

Spectrum View

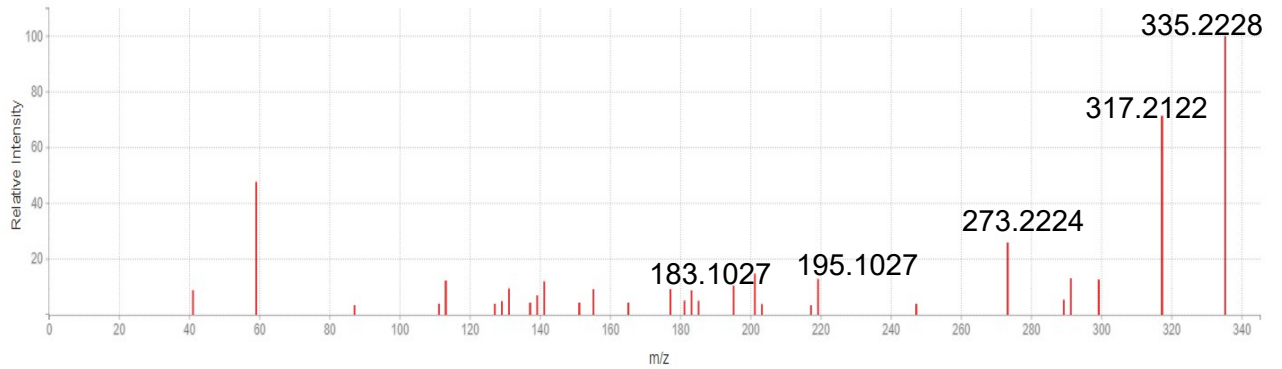

**4.LTD4**

**[M-H] :495.2534**

MS/MS spectrum of LTD4 detected in mouse lung tissue

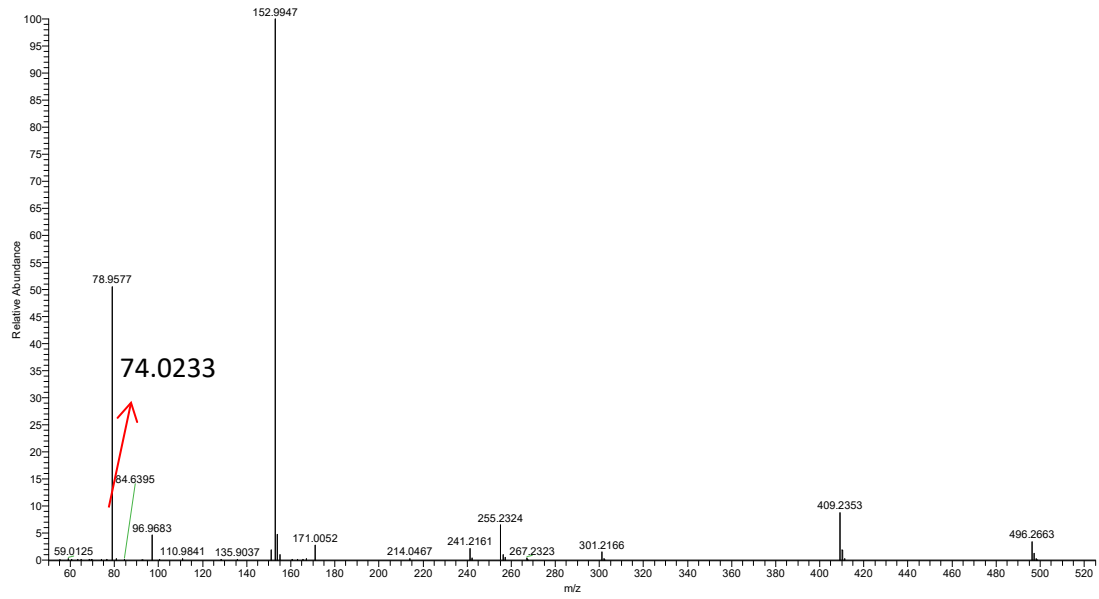

MS/MS spectrum of LTD4 from HMDB

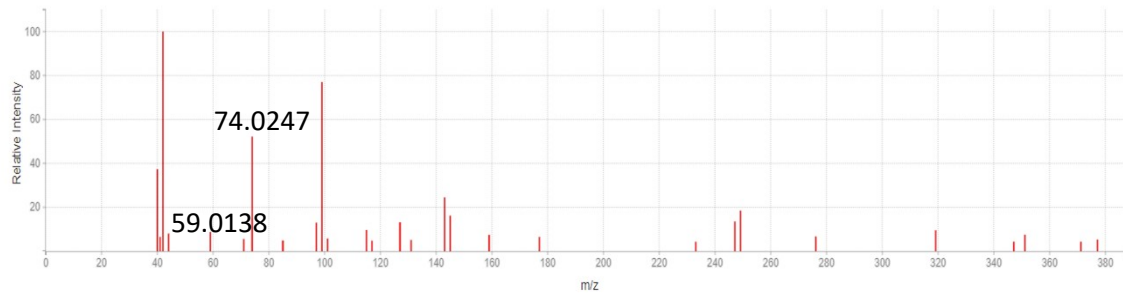

**5.5-HPETE**

**[M+H]:337.2373**

MS/MS spectrum of 5-HPETE detected in mouse lung tissue

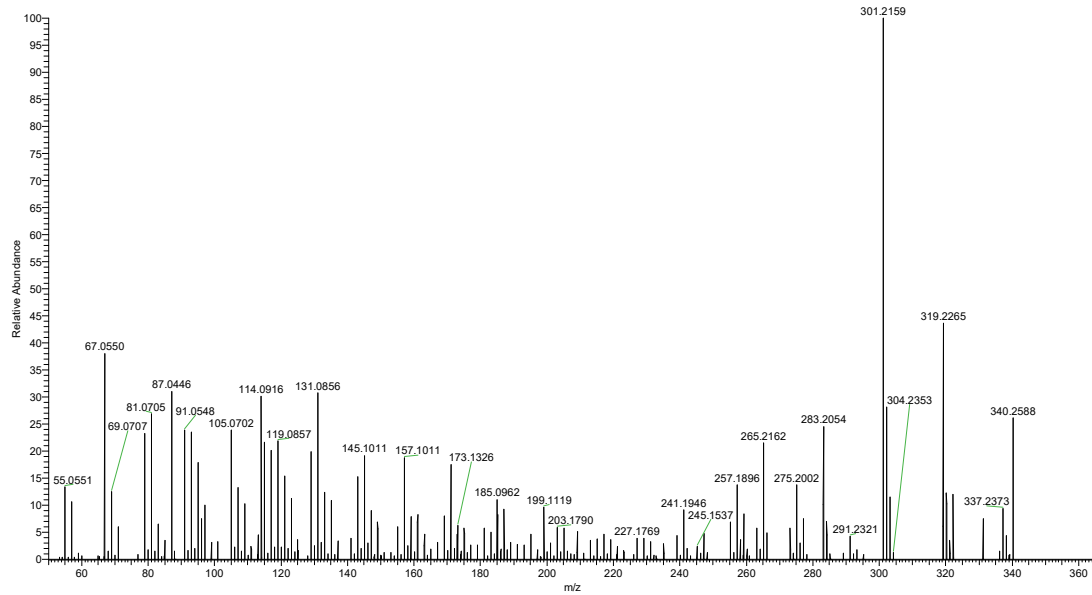

MS/MS spectrum of 5-HPETE from HMDB

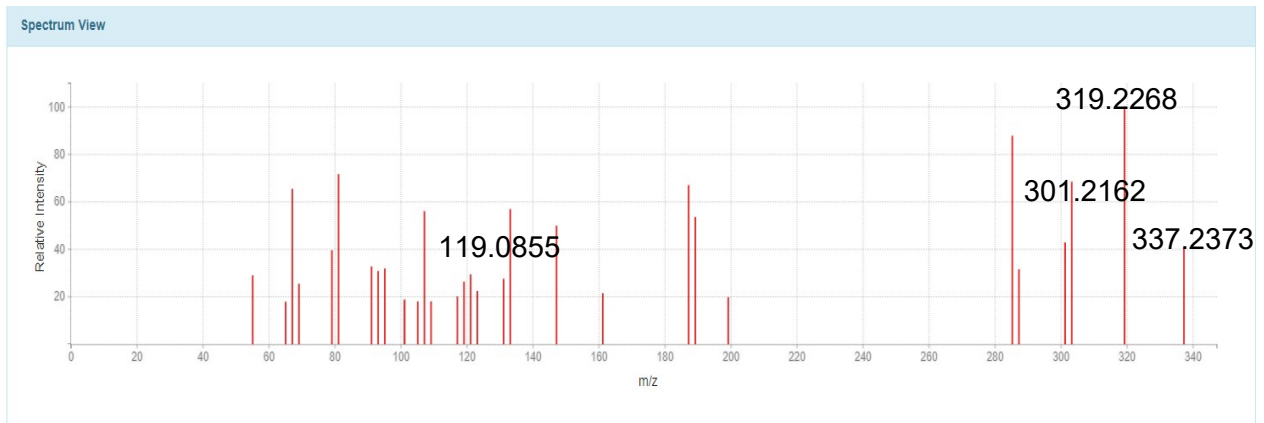

**6.L-Tryptophan**

**[M+H]<sup>+</sup>:205.0971**

MS/MS spectrum of L-Tryptophan detected in mouse lung tissue

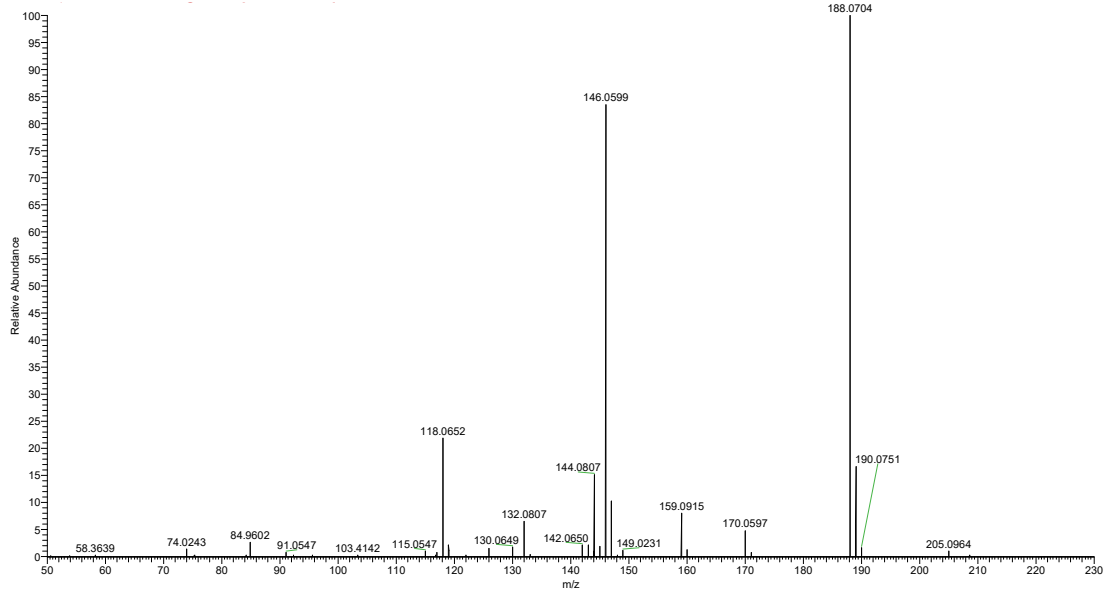

MS/MS spectrum of L-Tryptophan from mzCloud

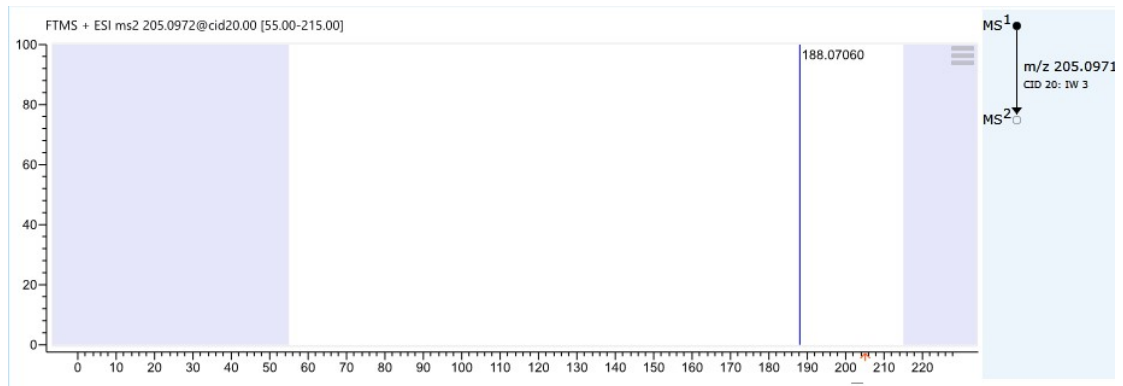

MS/MS spectrum of L-Tryptophan from Mass Bank

L-Tryptophan; LC-ESI-QTOF; MS2; CE 20 ev; [M+H]<sup>+</sup>

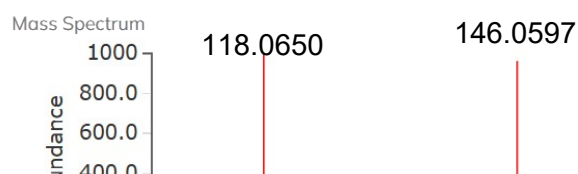

## **7.Hypoxanthine**

**[M+H]<sup>+</sup>:137.0457**

MS/MS spectrum of Hypoxanthine detected in mouse lung tissue

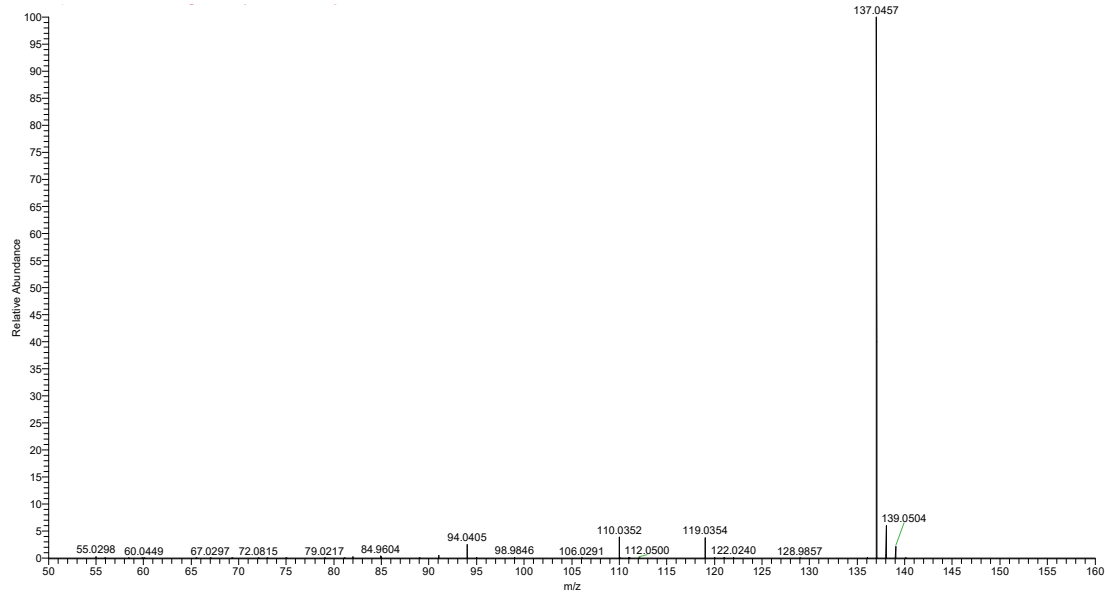

MS/MS spectrum of Hypoxanthine from mzCloud

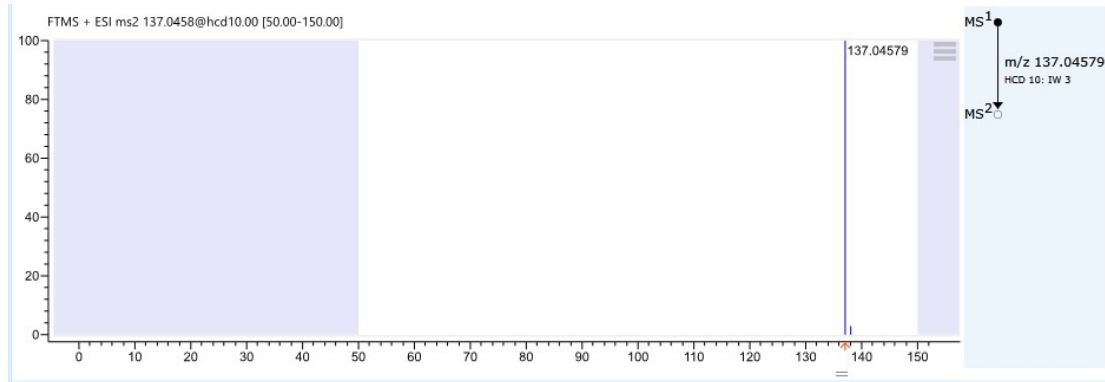

**8. Ornithine**

**[M+H]:133.0971**

MS/MS spectrum of Ornithine detected in mouse lung tissue

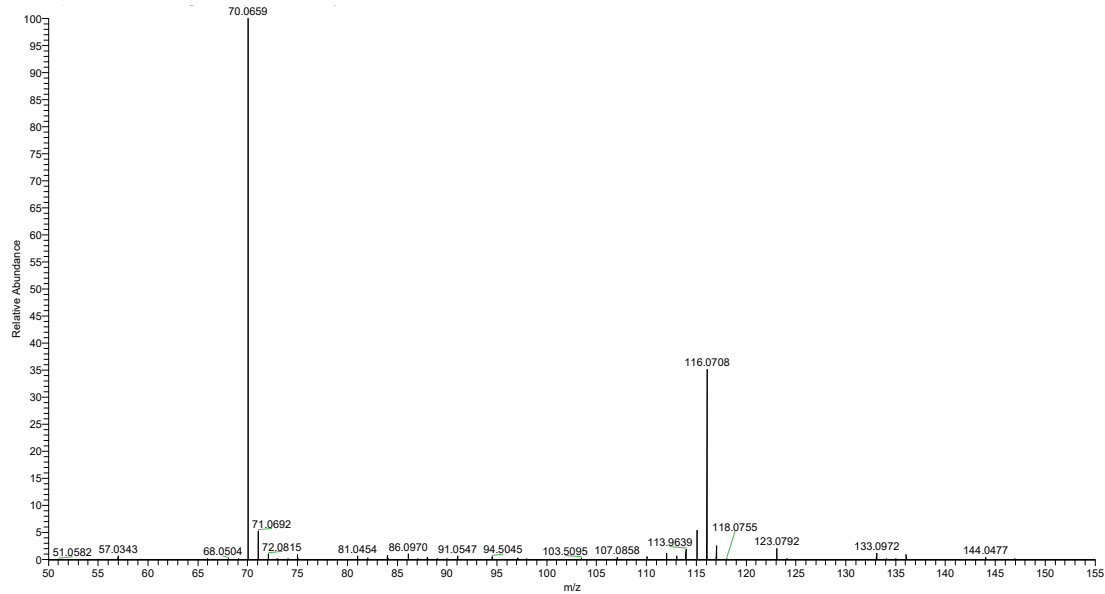

MS/MS spectrum of Ornithine from mzCloud

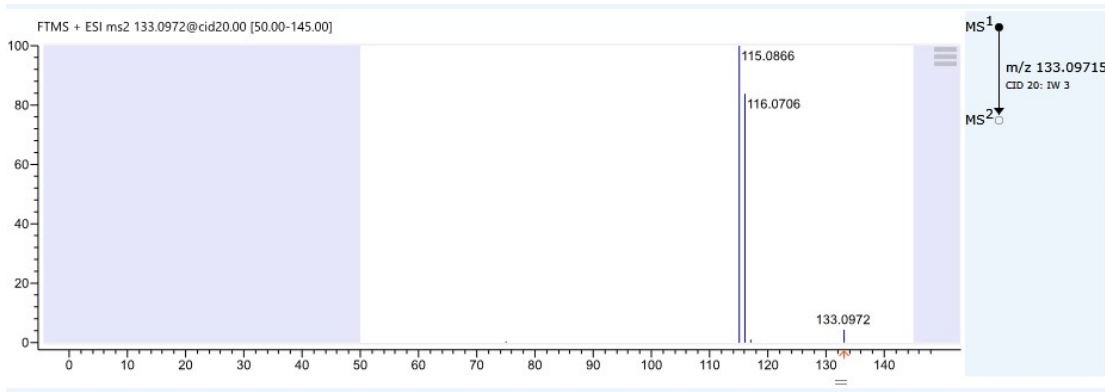

MS/MS spectrum of Ornithine from MassBank

L-Ornithine; ESI-QTOF; MS2; POSITIVE; [M+H]<sup>+</sup>; CID; 10 V

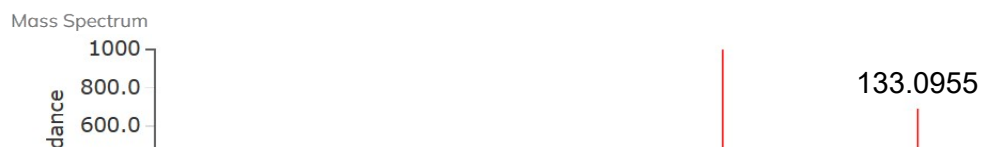



## **9. Histidine**

**[M+H]:156.0767**

MS/MS spectrum of Histidine detected in mouse lung tissue

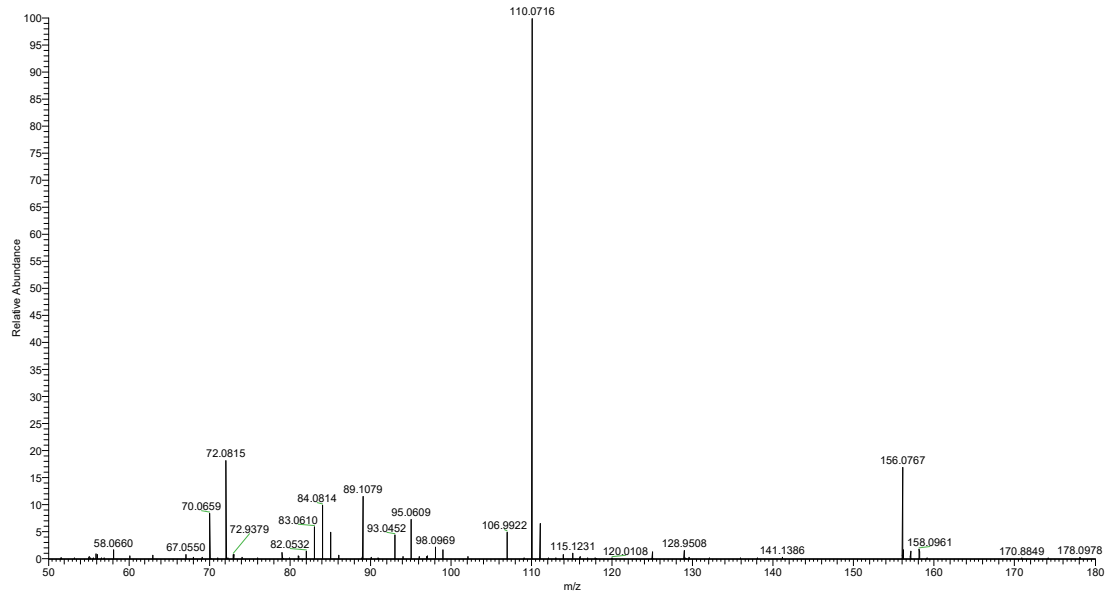

MS/MS spectrum of Histidine from mzCloud

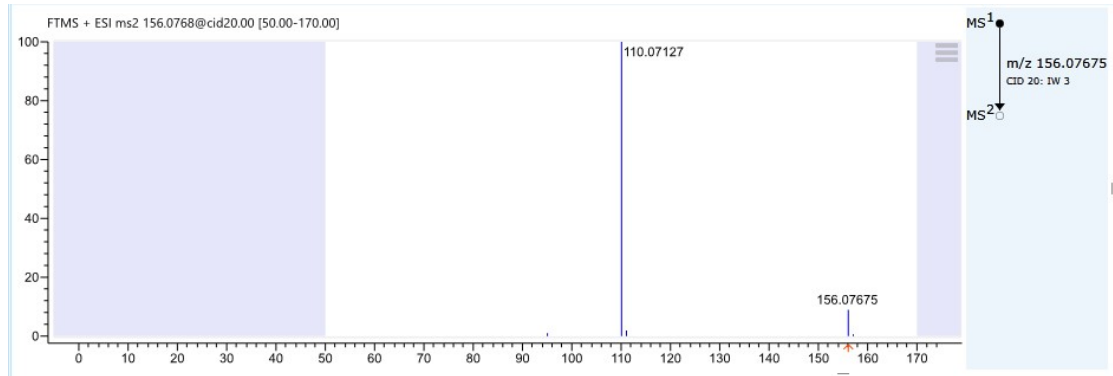

**10.Abietic acid**

**[M-H] : 301.2173**

MS/MS spectrum of Abietic acid detected in mouse lung tissue

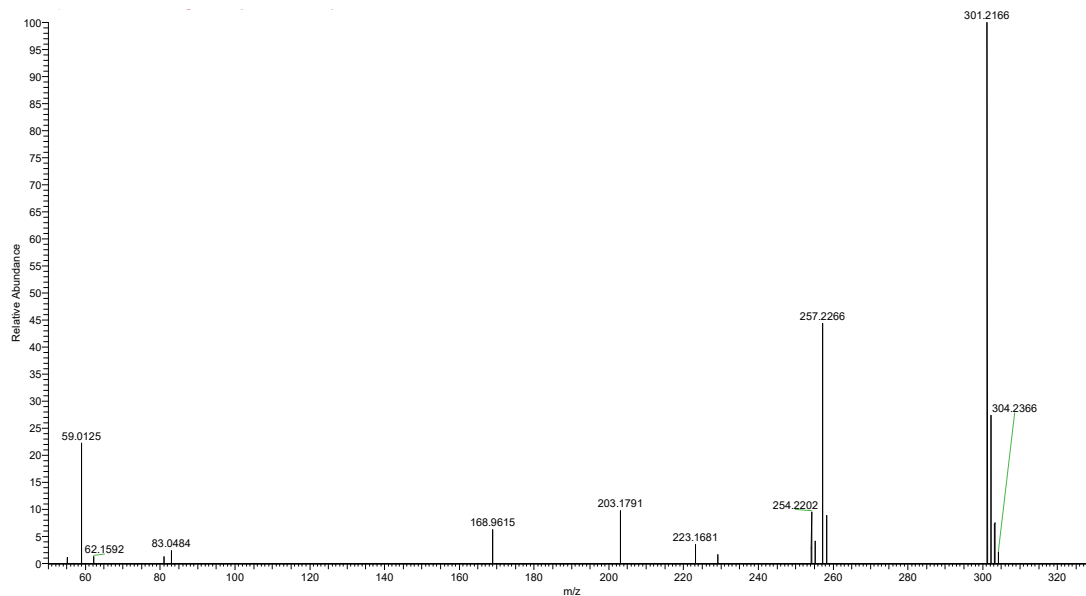

MS/MS spectrum of Abietic acid from mzCloud

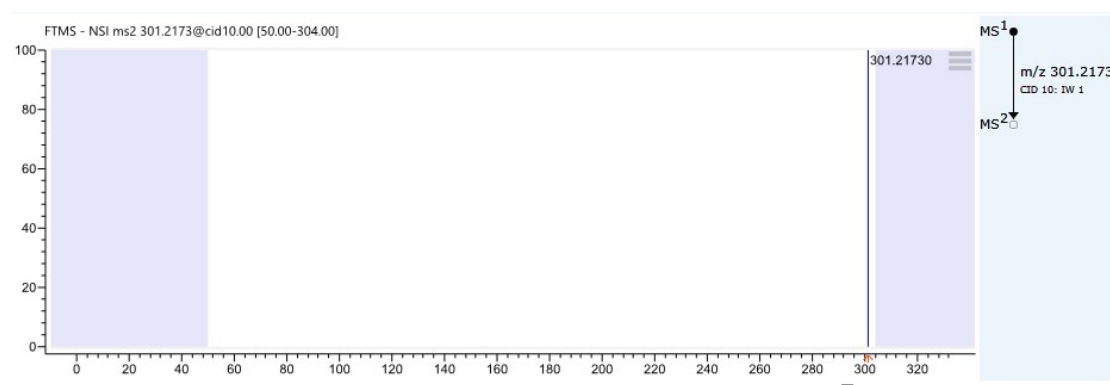

MS/MS spectrum of Abietic acid from MassBank

Abietic acid; LC-ESI-QTOF; MS2; CE 20 ev; [M-H]-

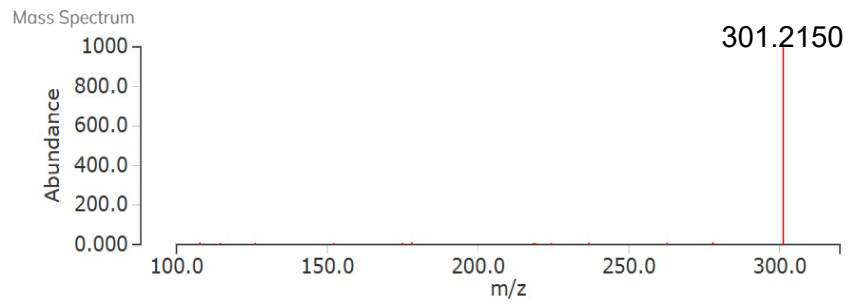

**11.Uridine**

[M-H]<sup>-</sup>:243.0622

MS/MS spectrum of Uridine detected in mouse lung tissue

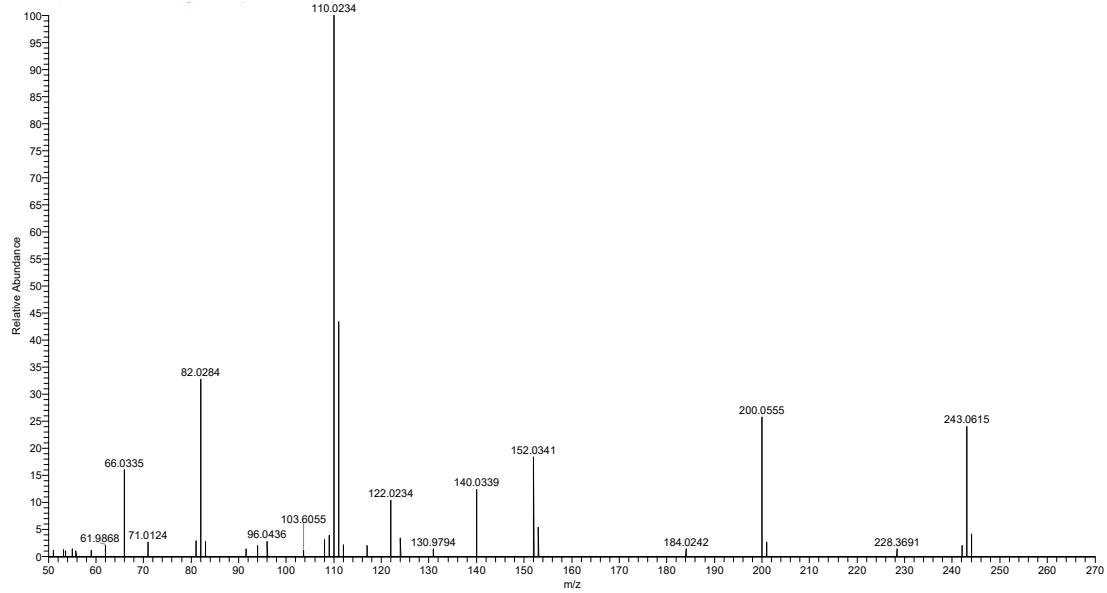

MS/MS spectrum of Uridine from mzCloud

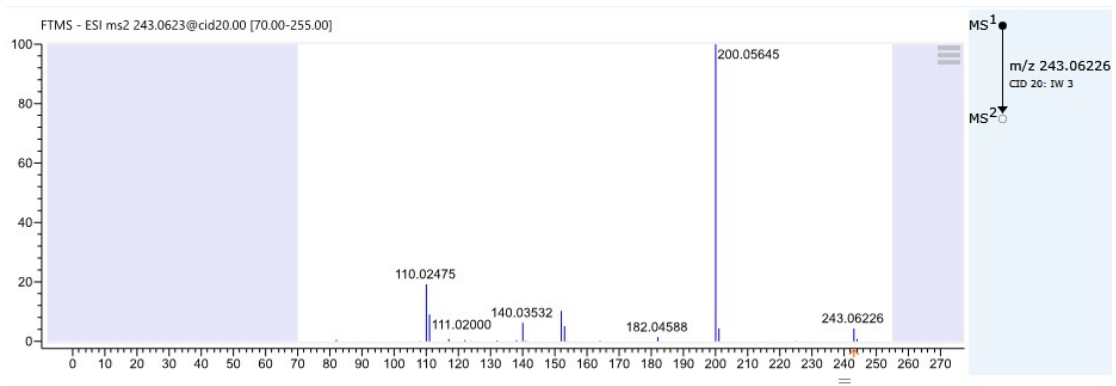

MS/MS spectrum of Uridine from MassBank

Uridine; LC-ESI-QTOF; MS2; CE: 20; R=; [M-H]-

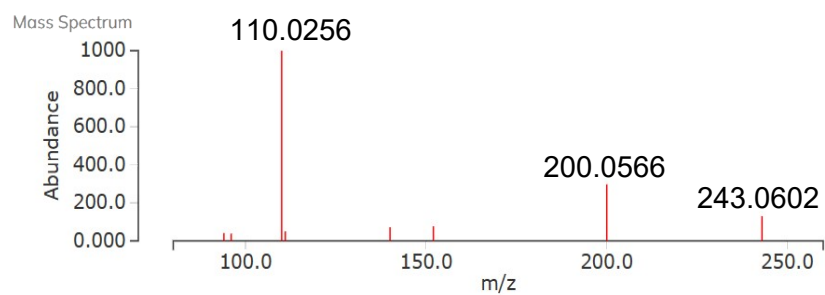

**12.Uracil**

**[M+H]:113.0345**

MS/MS spectrum of Uracil detected in mouse lung tissue

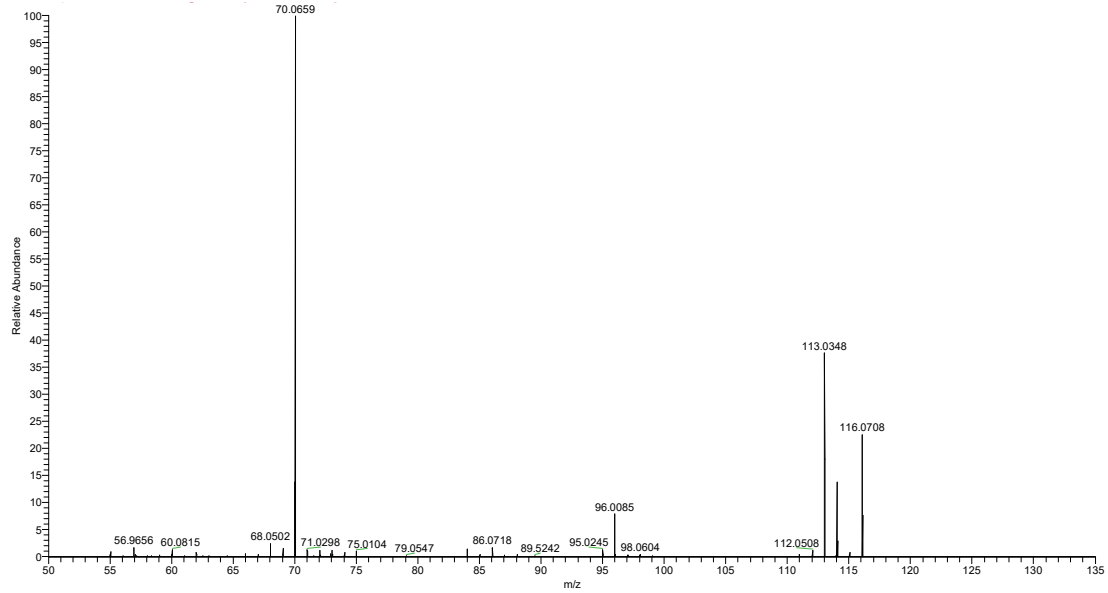

MS/MS spectrum of Uracil from HMDB

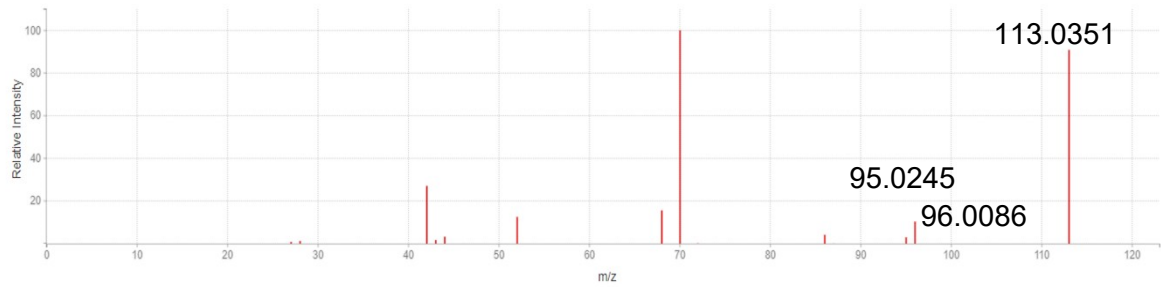

MS/MS spectrum of Uridine from MassBank

Uracil; LC-ESI-QTOF; MS2; CE:Ramp 5-60 V; [M+H]<sup>+</sup>

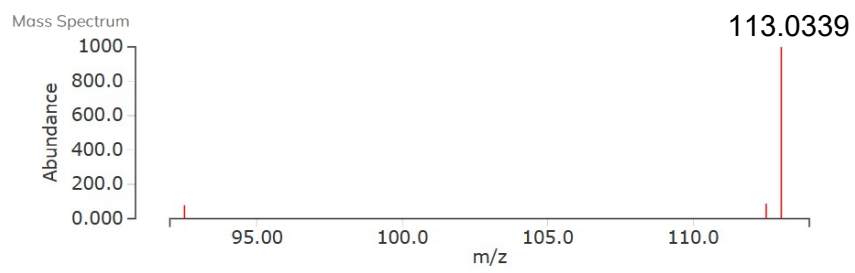



### 13. Lipoxin A4 (LXA4)

[M+H]:353.2322

MS/MS spectrum of LXA4 detected in mouse lung tissue

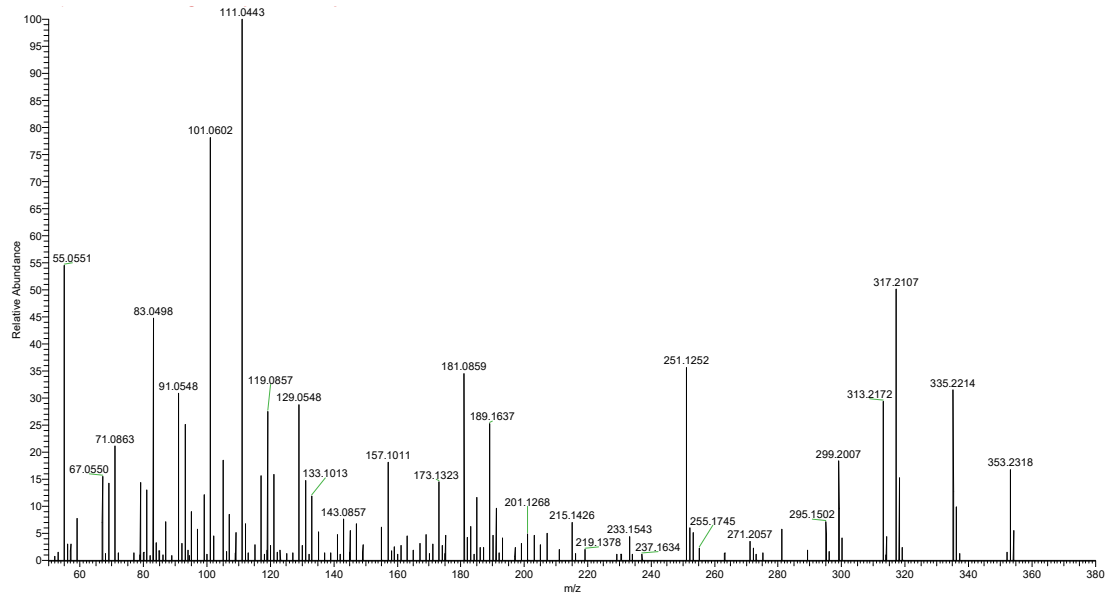

MS/MS spectrum of LXA4 from HMDB

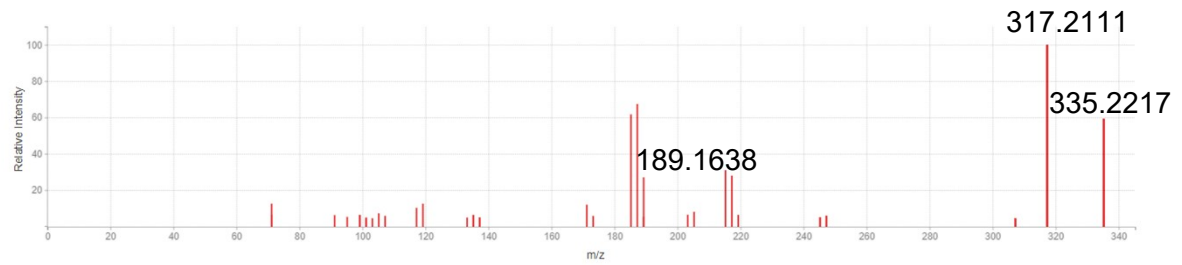

# 14.5-HETE

[M-H] :319.2278

MS/MS spectrum of 5-HETE detected in mouse lung tissue

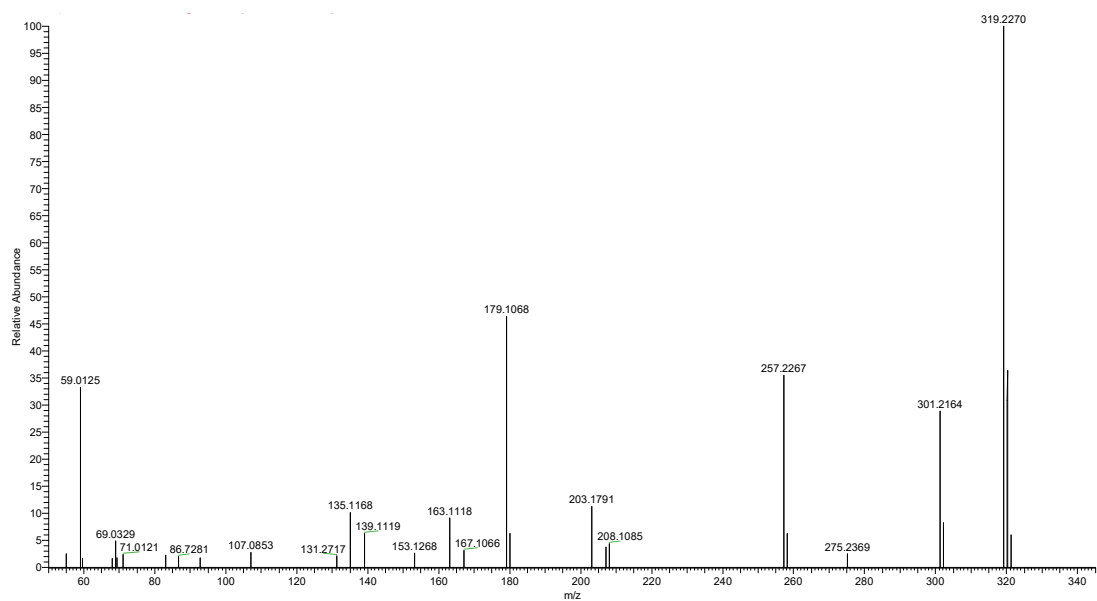

MS/MS spectrum of 5-HETE from HMDB

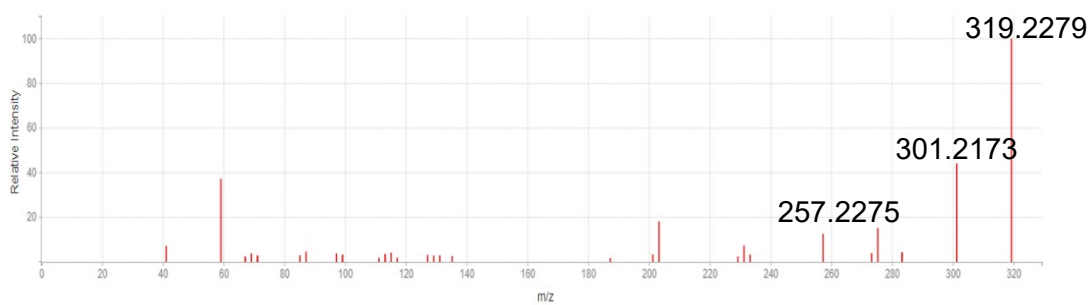

# 15. $\alpha$ -Linolenic acid

[M-H] :277.2173

MS/MS spectrum of  $\alpha$ -Linolenic acid detected in mouse lung tissue

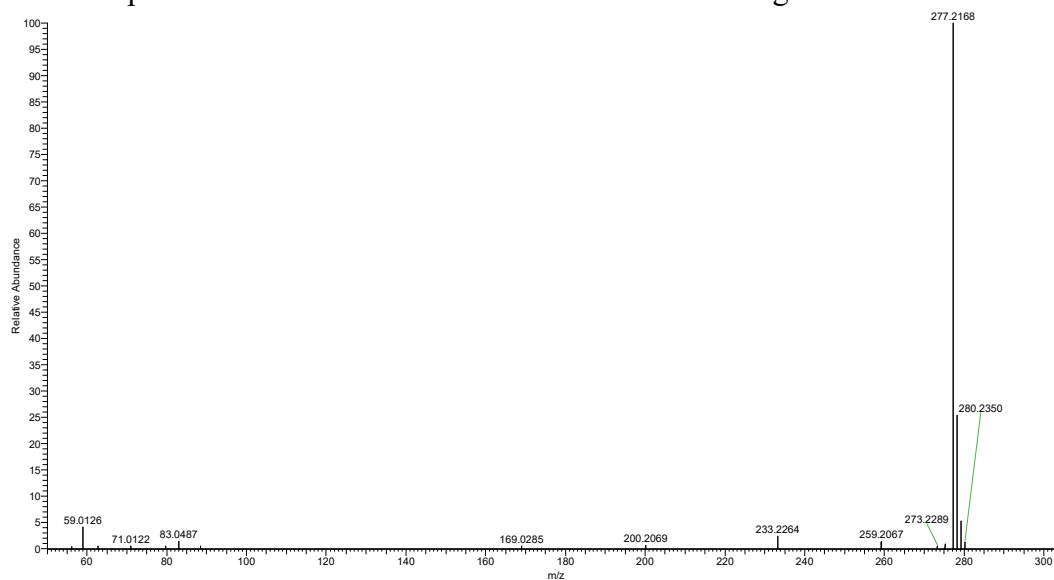

MS/MS spectrum of  $\alpha$ -Linolenic acid from HMDB

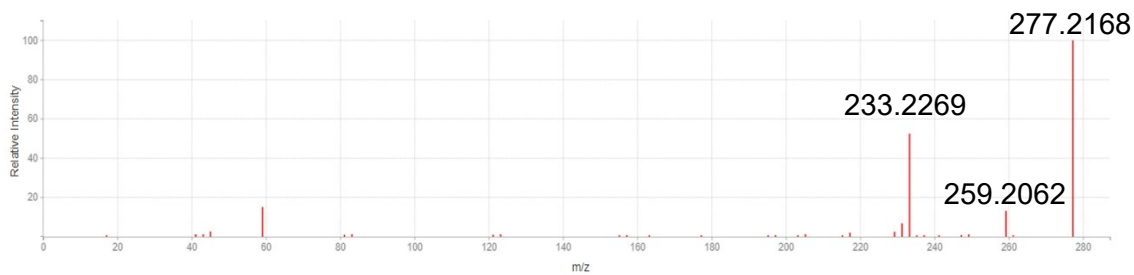

## 16. Linoleic acid

[M-H] :279.2329

MS/MS spectrum of Linoleic acid detected in mouse lung tissue

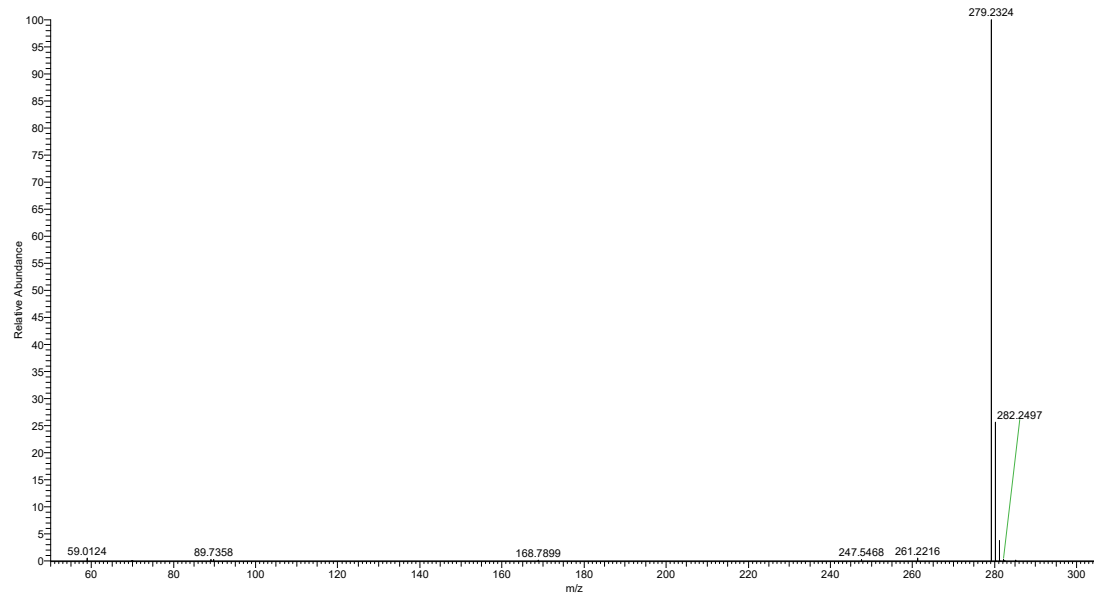

MS/MS spectrum of Linoleic acid from HMDB

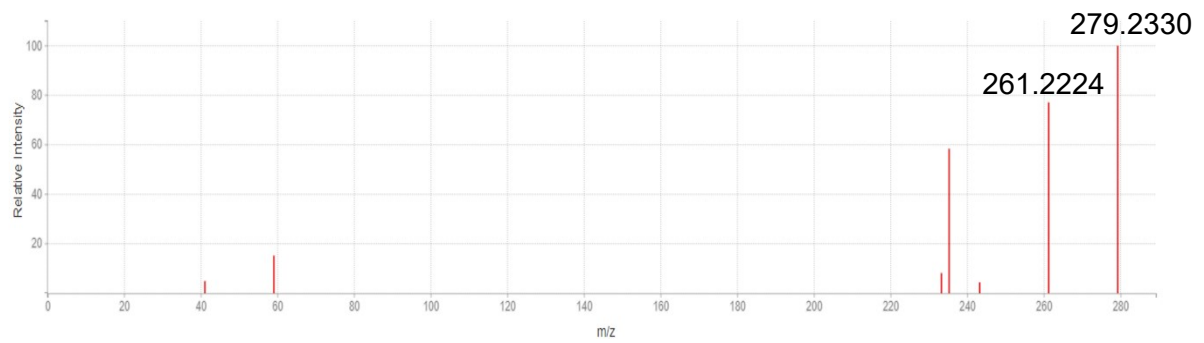

MS/MS spectrum of Linoleic acid from MassBank

Linoleic acid; LC-ESI-QTOF; MS2; CE: 20; R=; [M-H]-

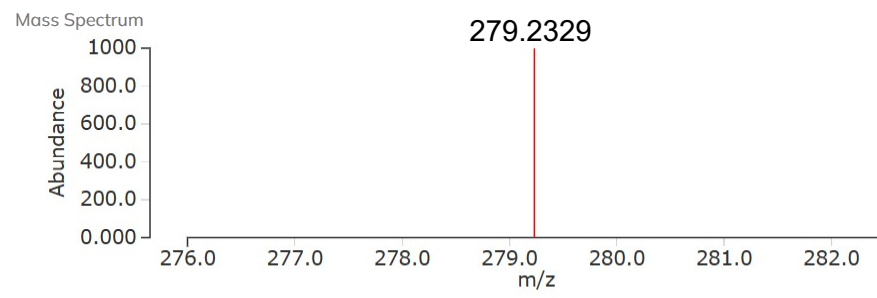

# 17.Kynurenine

[M+H]: 209.0920

MS/MS spectrum of Kynurenine detected in mouse lung tissue

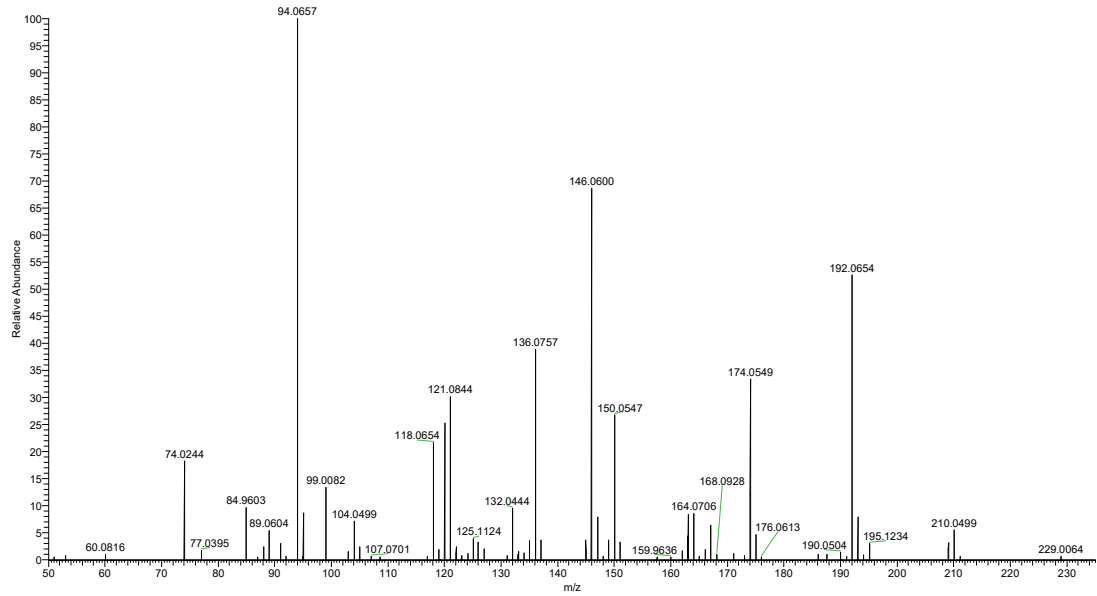

MS/MS spectrum of Kynurenine from HMDB

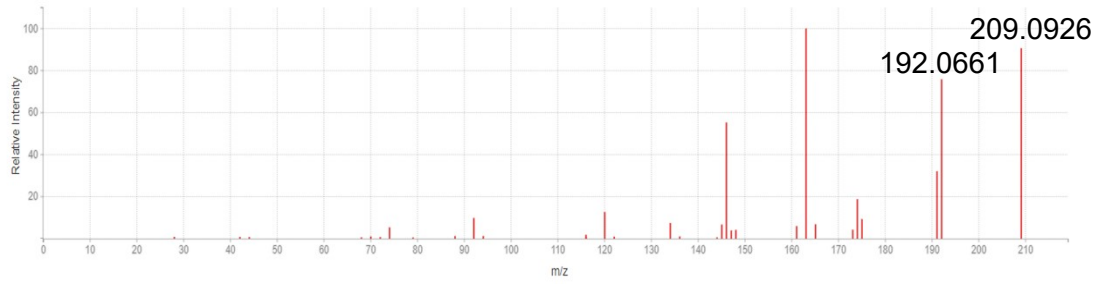

MS/MS spectrum of Kynurenine from MassBank

Kynurenine; LC-ESI-QTOF; MS2; [M+H]<sup>+</sup>; CE: 10eV

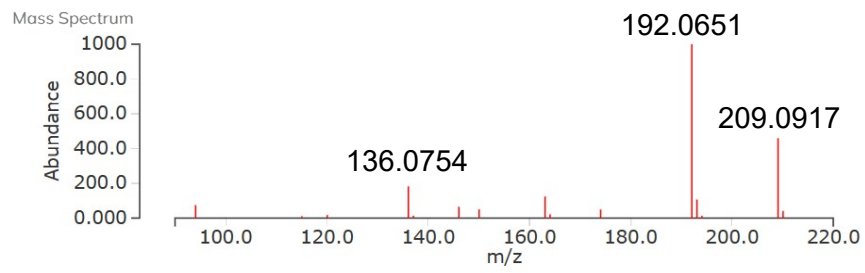

# 18.Xanthine

[M+H]:153.0407

MS/MS spectrum of Xanthine detected in mouse lung tissue

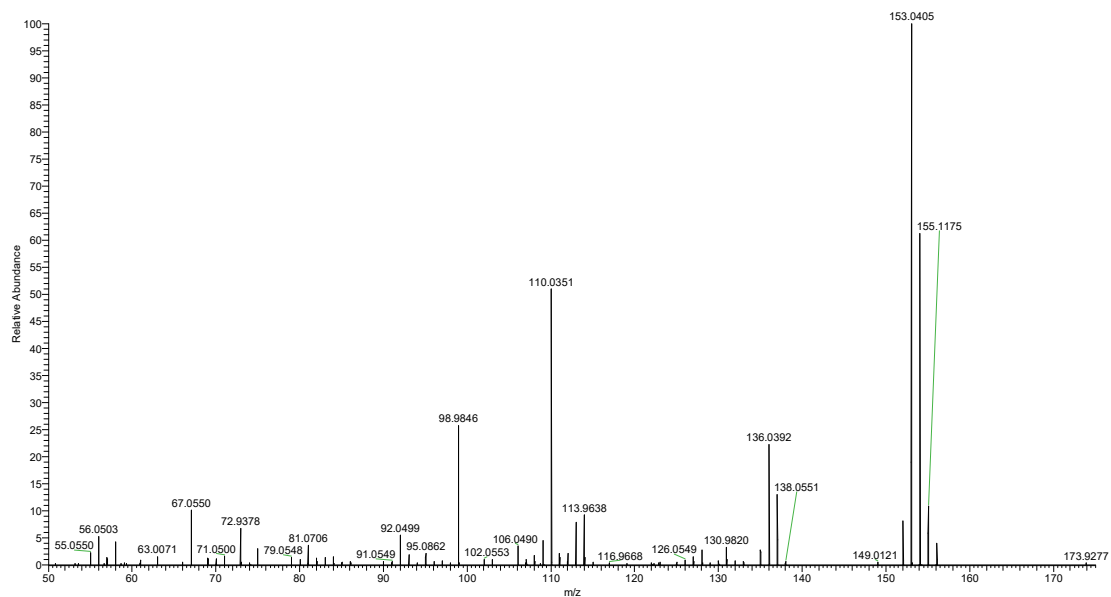

MS/MS spectrum of Xanthine from mzCloud

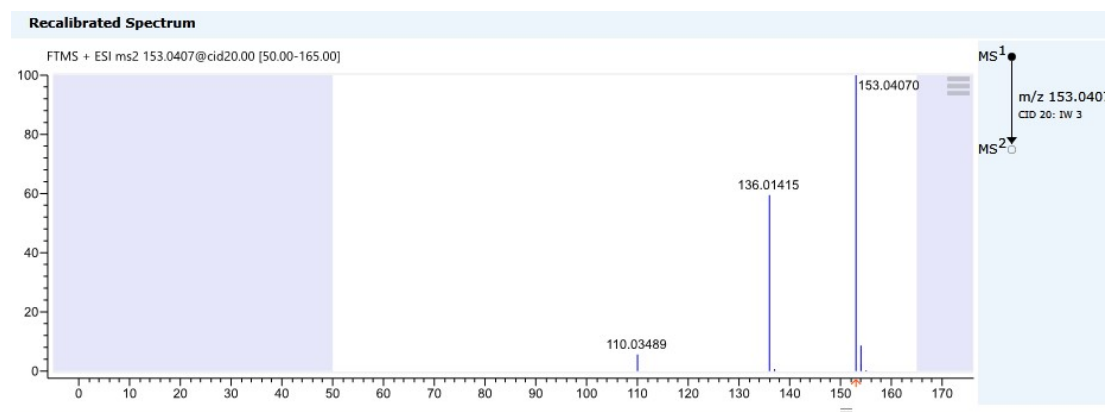



MS/MS spectrum of Xanthine from MassBank

Xanthine; LC-ESI-QTOF; MS2; CE: 20; R=; [M+H]<sup>+</sup>

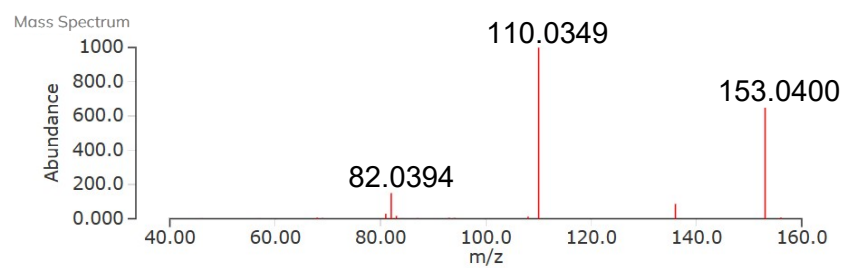

# 19. Adenosine

[M+H]:268.1040

MS/MS spectrum of Adenosine detected in mouse lung tissue

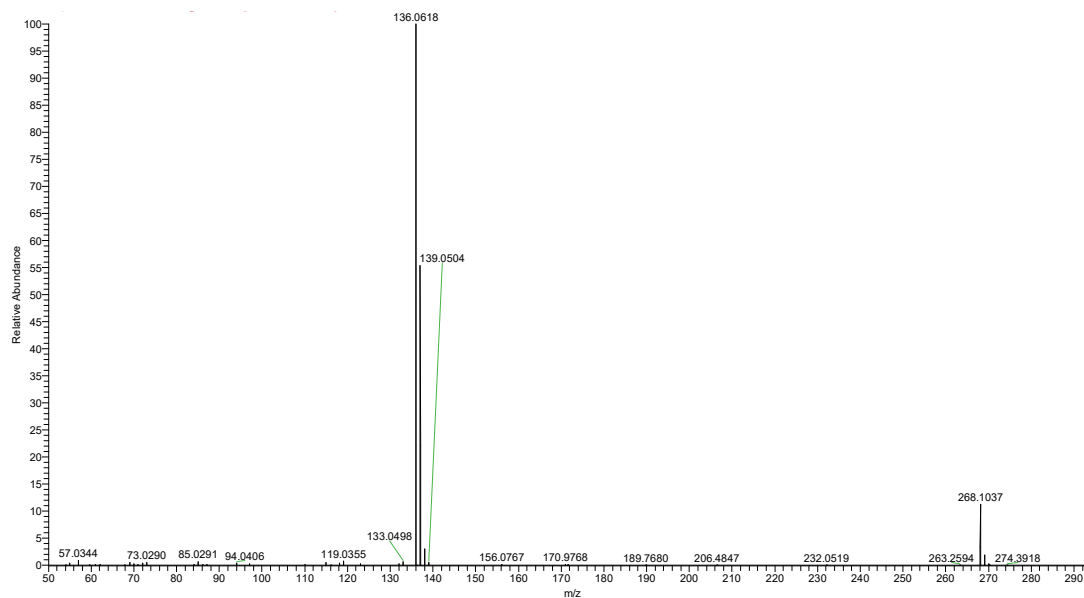

MS/MS spectrum of Adenosine from mzCloud

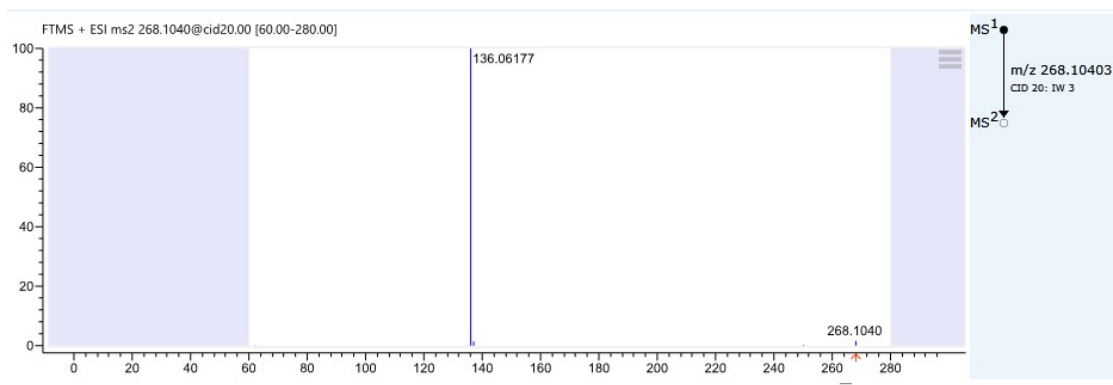

MS/MS spectrum of Adenosine from MassBank

Adenosine; LC-ESI-QTOF; MS2; [M+H]<sup>+</sup>; CE: 10eV

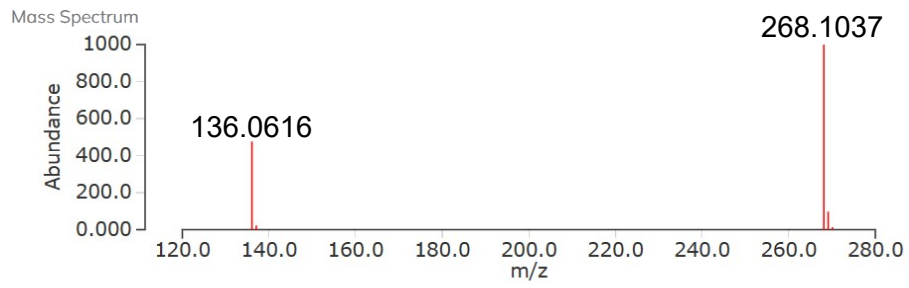

## 20. Inosine

[M+H]:269.0880

MS/MS spectrum of Inosine detected in mouse lung tissue

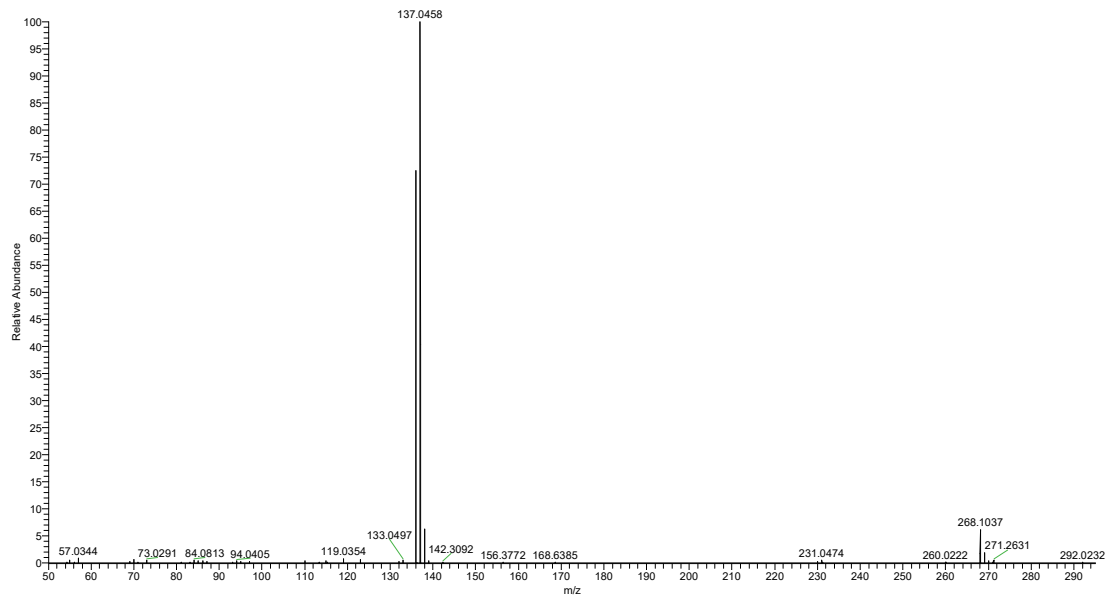

MS/MS spectrum of Inosine from mzCloud

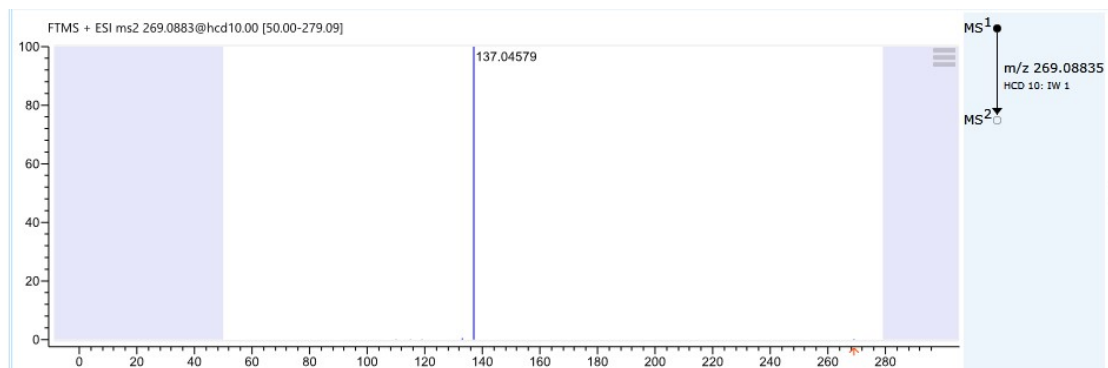

## 21. Glutathione

[M+H]<sup>+</sup>: 308.0910

MS/MS spectrum of Glutathione detected in mouse lung tissue

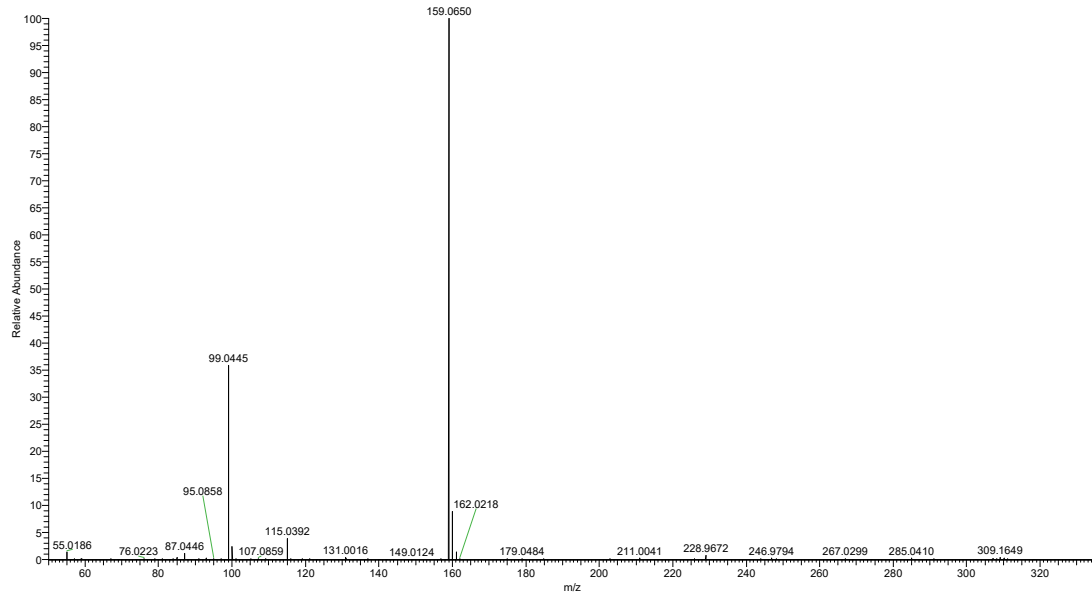

MS/MS spectrum of Glutathione from mzCloud

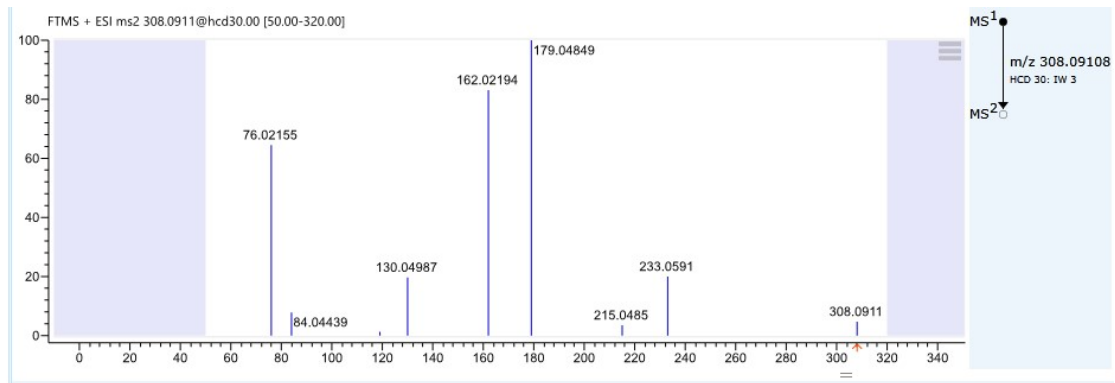

## 22. Pyroglutamic acid

[M+H]:130.0498

MS/MS spectrum of Pyroglutamic acid detected in mouse lung tissue

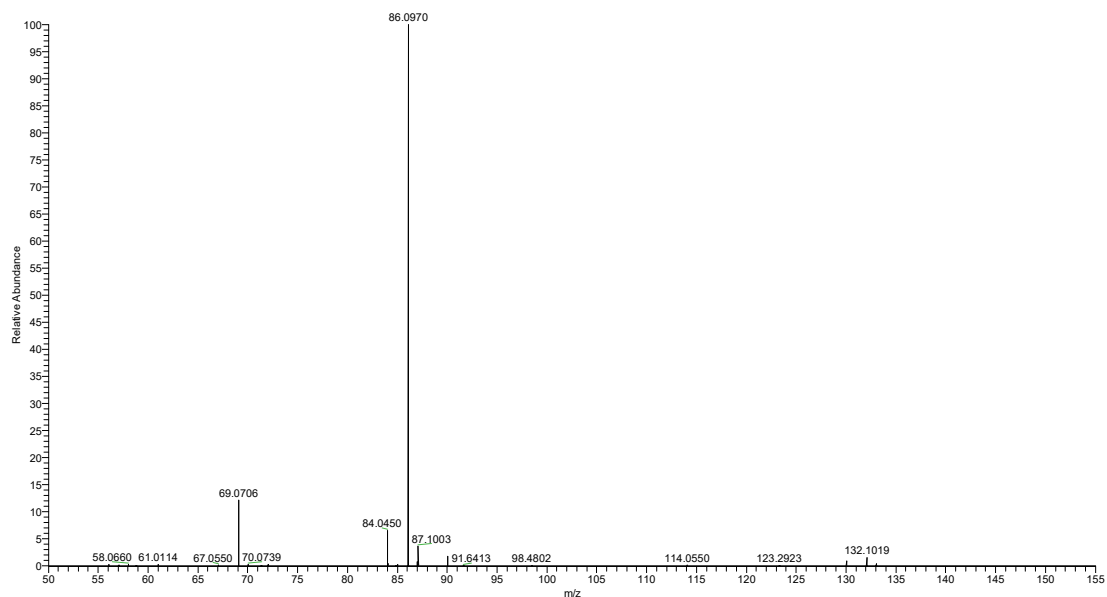

MS/MS spectrum of Pyroglutamic acid from mzCloud

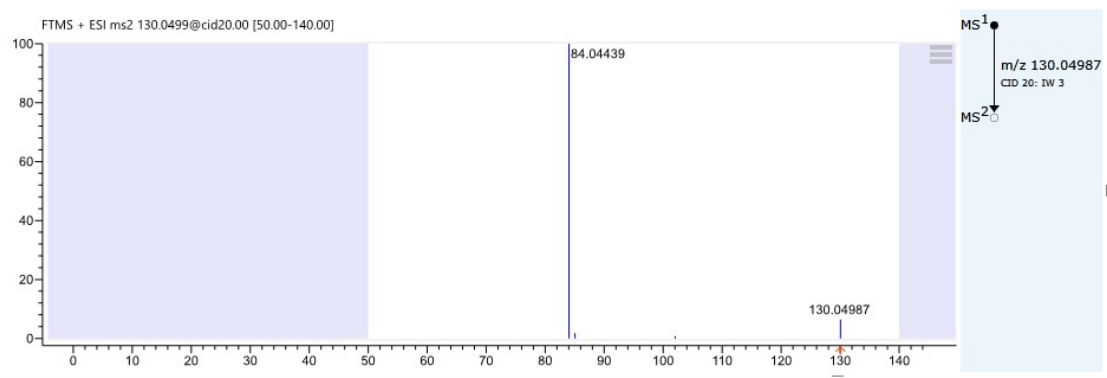

## 23.Histamine

[M+H]:112.0869

MS/MS spectrum of Histamine detected in mouse lung tissue

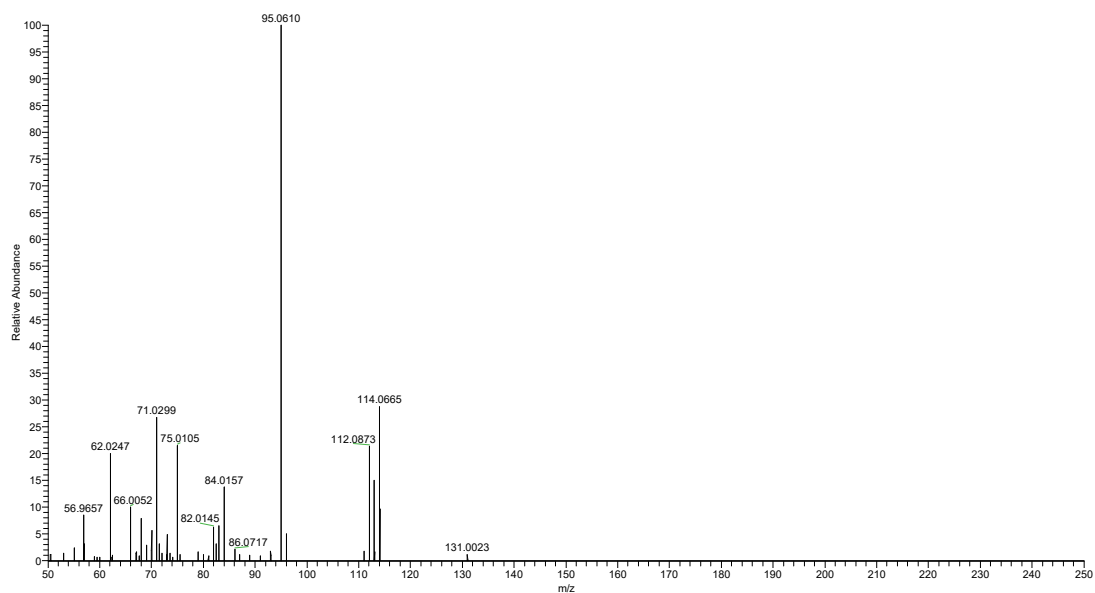

MS/MS spectrum of Histamine from HMDB

Spectrum View

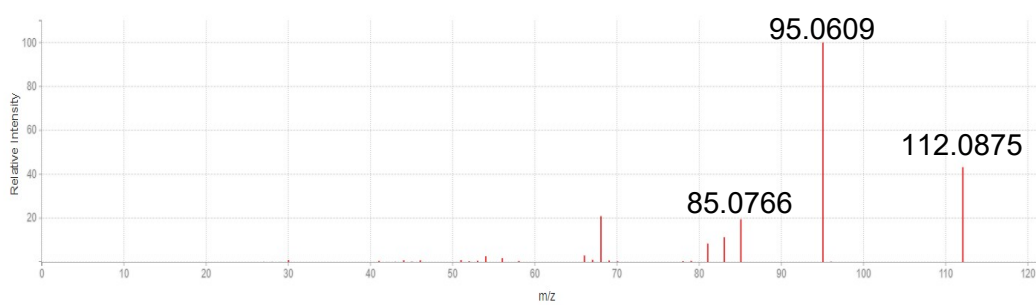

MS/MS spectrum of Histamine from MassBank

Histamine; LC-ESI-QTOF; MS2; HILIC; CE: 10 eV; R=35000; [M+H]<sup>+</sup>

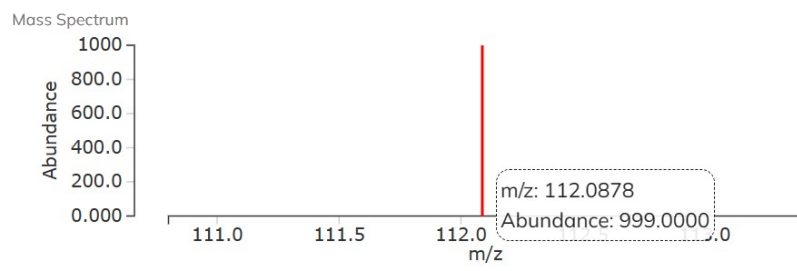



## 24.Uric acid

[M-H]:167.0210

MS/MS spectrum of Uric acid detected in mouse lung tissue

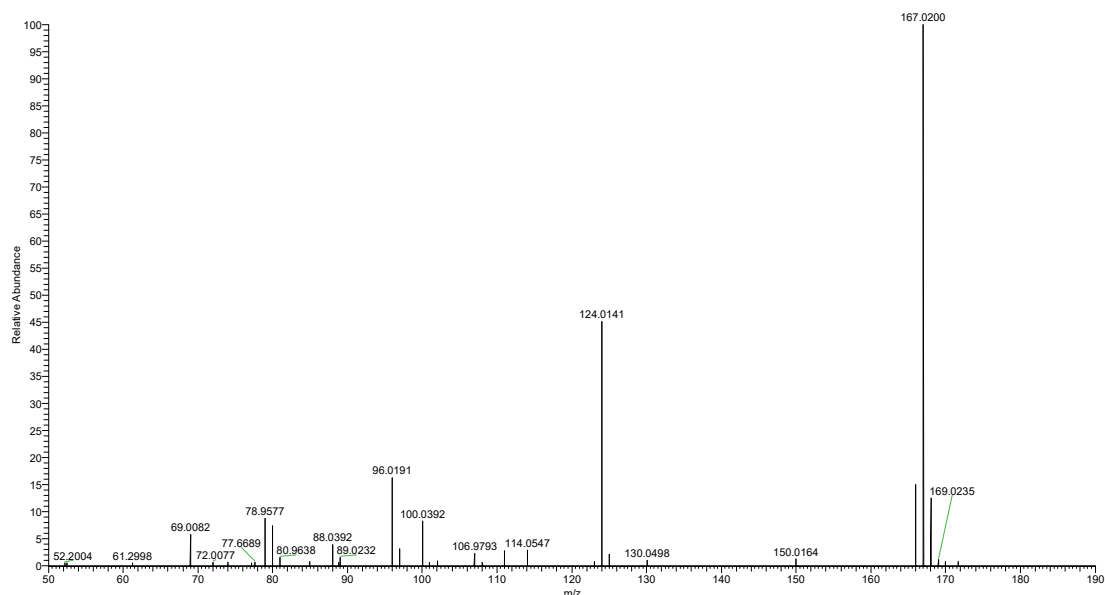

MS/MS spectrum of Uric acid from HMDB

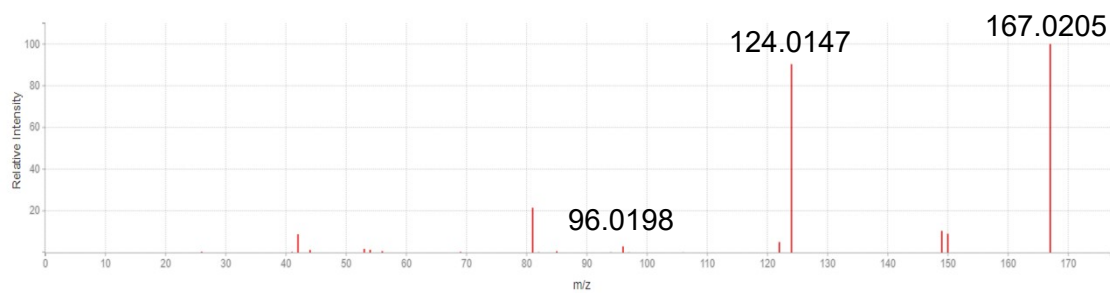

## 25. PGD2

[M+H]:353.2322

MS/MS spectrum of PGD2 detected in mouse lung tissue

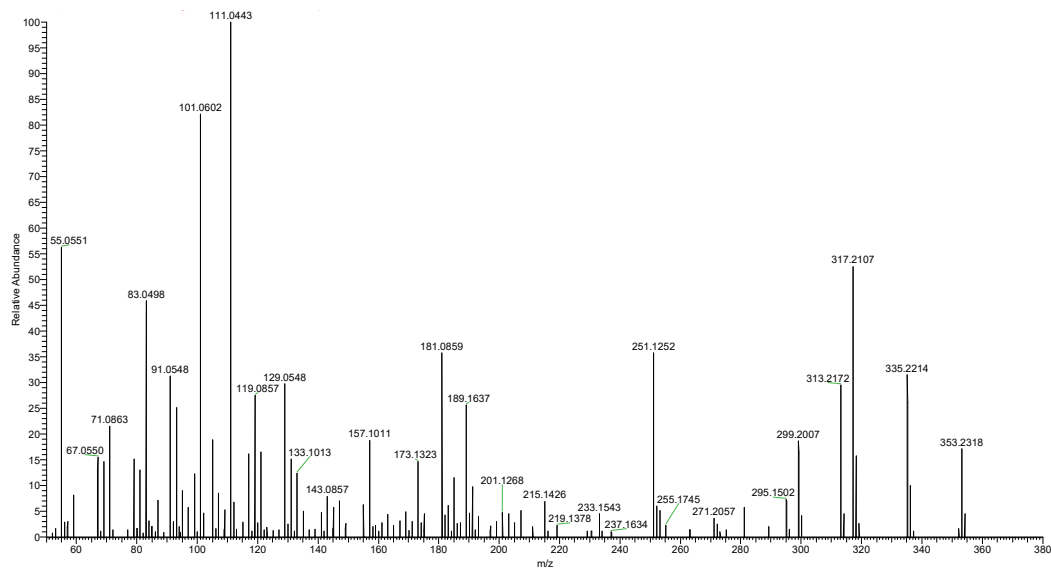

MS/MS spectrum of PGD2 from HMDB

Spectrum View

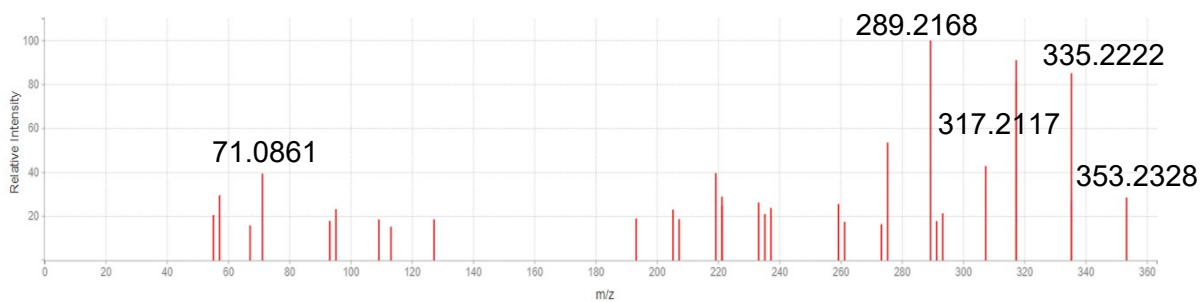

## 26. Adenine

[M+H]:136.0617

MS/MS spectrum of Adenine detected in mouse lung tissue

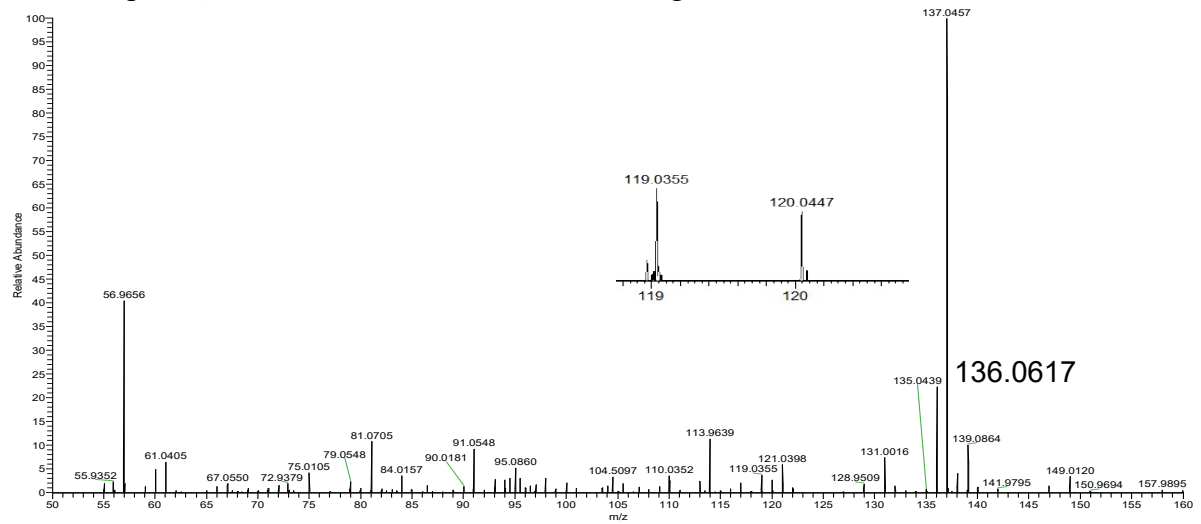

MS/MS spectrum of Adenine from MassBank

Adenine; LC-ESI-QTOF; MS2; CE:30 V; [M+H]<sup>+</sup>

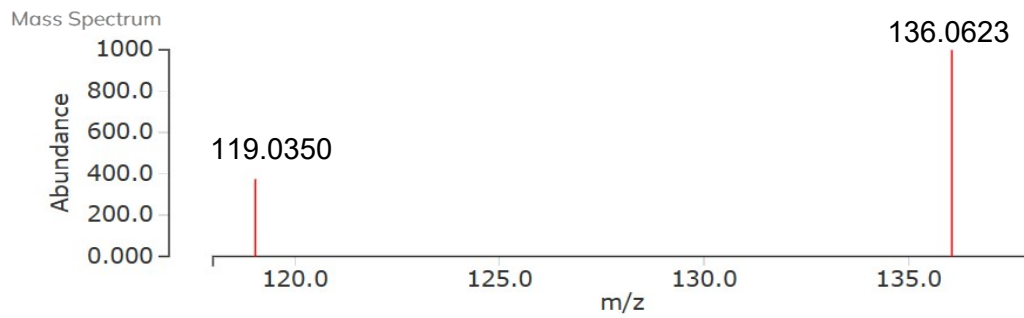

**Fig S4** MS/MS spectra of different metabolites in serum detected by UPLC-MS/MS.

### 1.L-Arginine

**[M+H]:175.1189**

MS/MS spectrum of L-Arginine detected in mouse serum

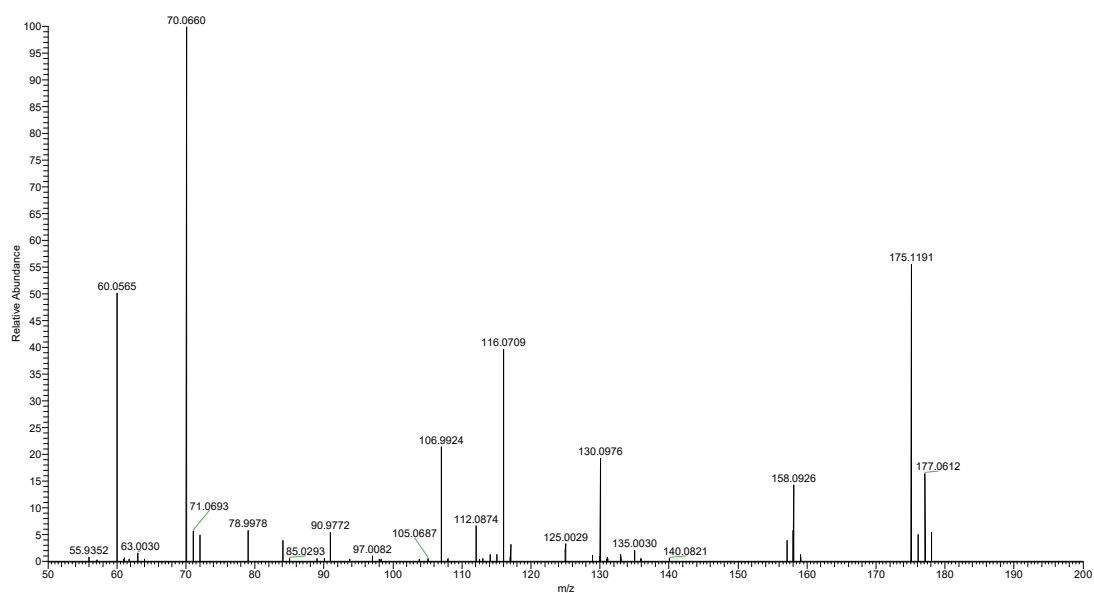

MS/MS spectrum of L-Arginine from MassBank

L-Arginine; ESI-QTOF; MS2; POSITIVE; [M+H]<sup>+</sup>; CID; 10 V

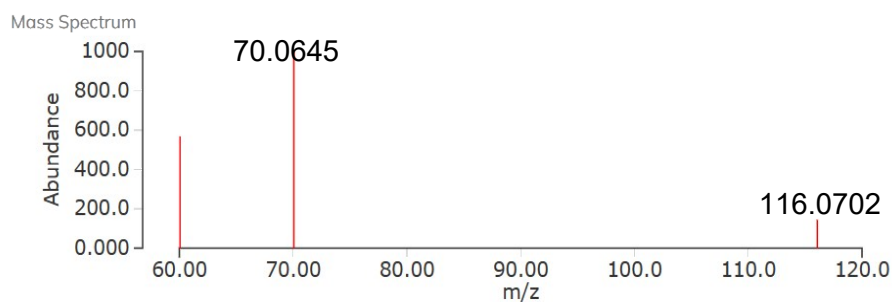

## 2. Kynurenine

[M+H]: 209.0920

MS/MS spectrum of Kynurenine detected in mouse serum

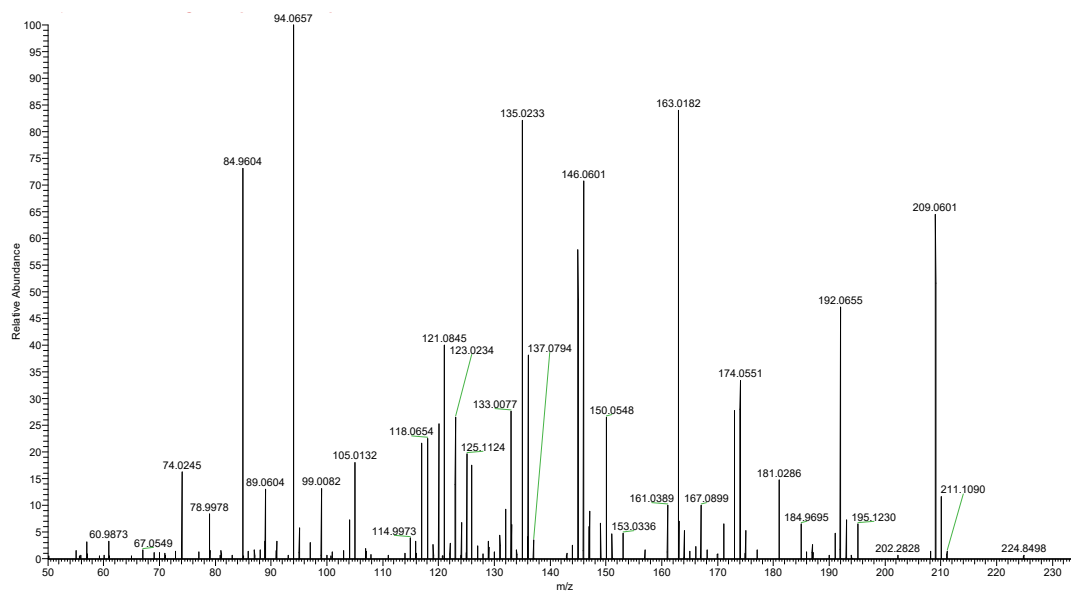

MS/MS spectrum of Kynurenine from HMDB

Spectrum View

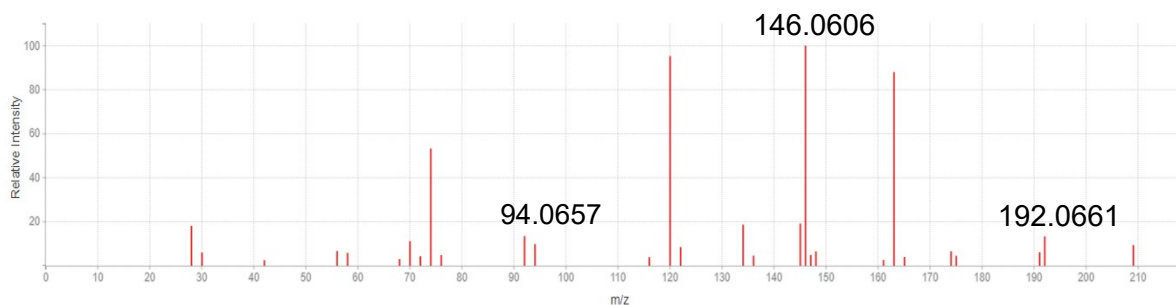

MS/MS spectrum of Kynurenine from MassBank

Kynurenine; LC-ESI-QTOF; MS2; [M+H]<sup>+</sup>; CE: 10eV

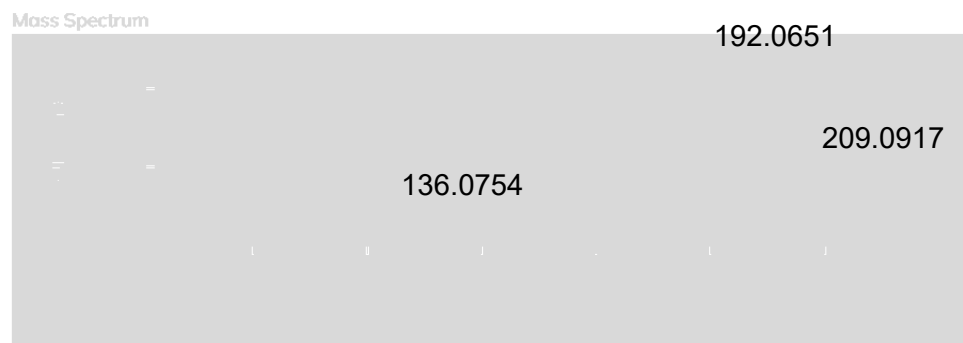

### 3. Glutamate

[M+H]: 148.0604

MS/MS spectrum of Glutamate detected in mouse serum

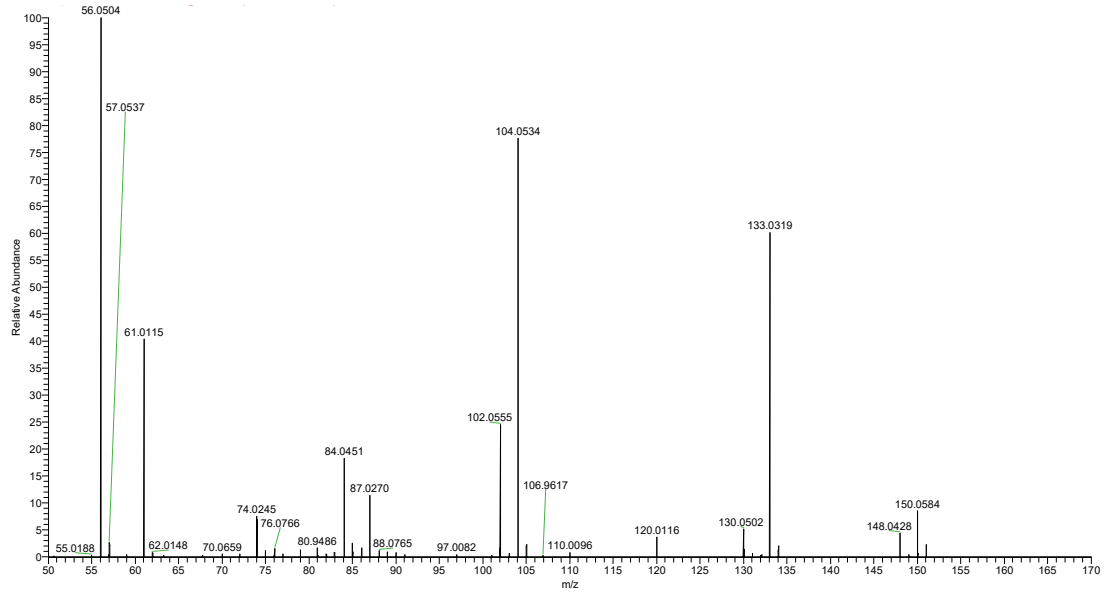

MS/MS spectrum of Glutamate from HMDB

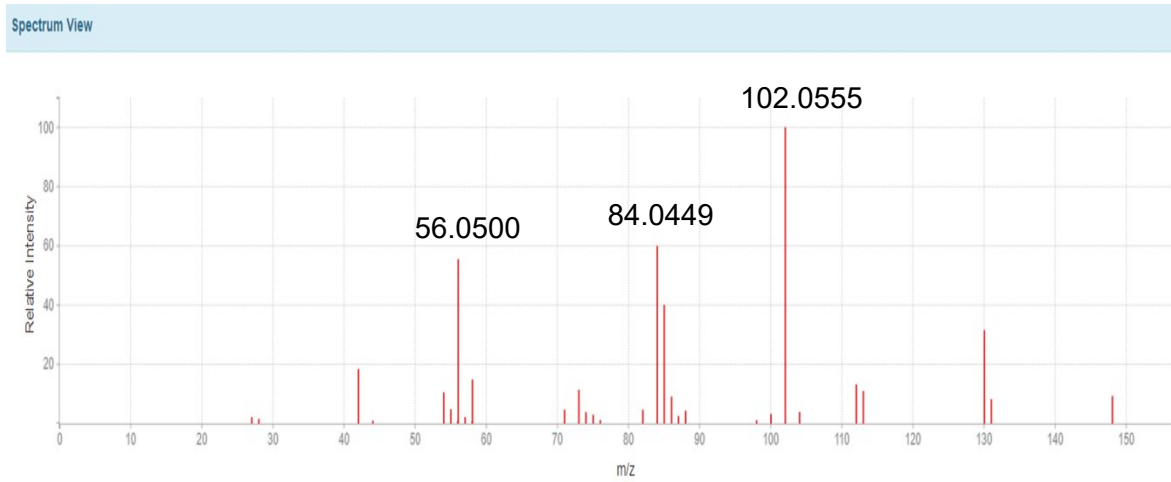

## 4. Uric acid

[M+H]: 169.0356

MS/MS spectrum of Uric acid detected in mouse serum

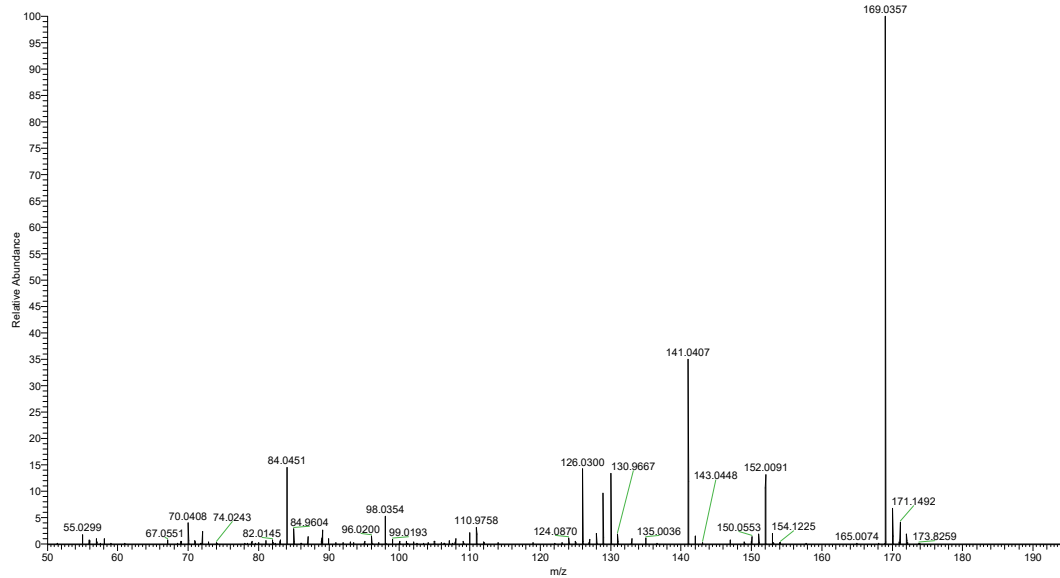

MS/MS spectrum of Uric acid from HMDB

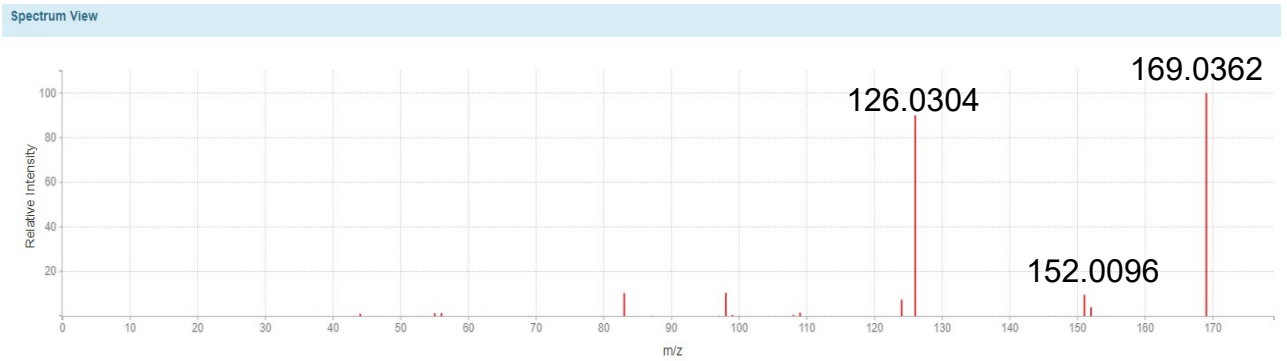



## 5. LTA4

[M+H]: 319.2267

MS/MS spectrum of LTA4 detected in mouse serum

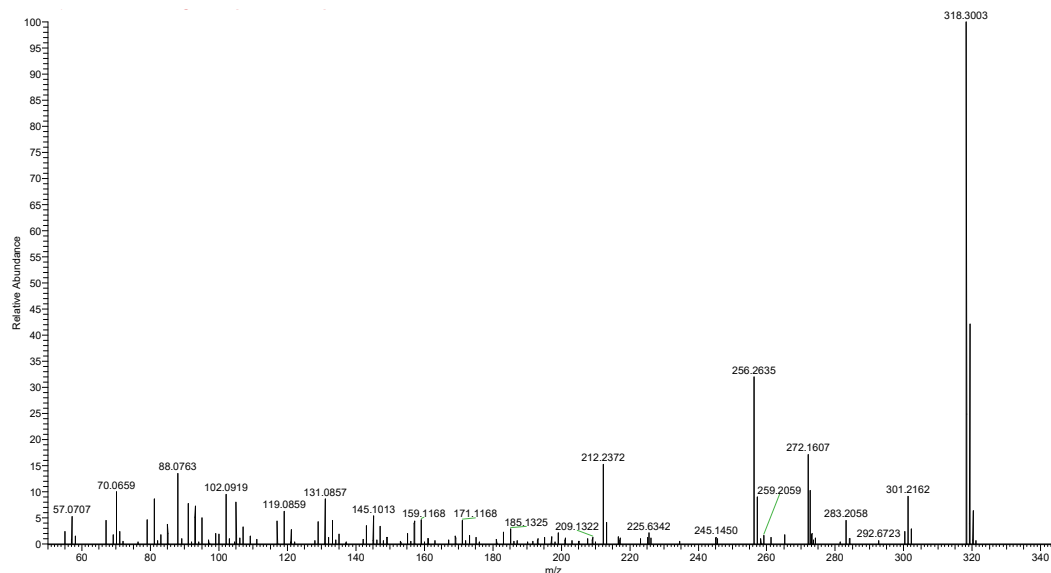

MS/MS spectrum of LTA4 from HMDB

Spectrum View

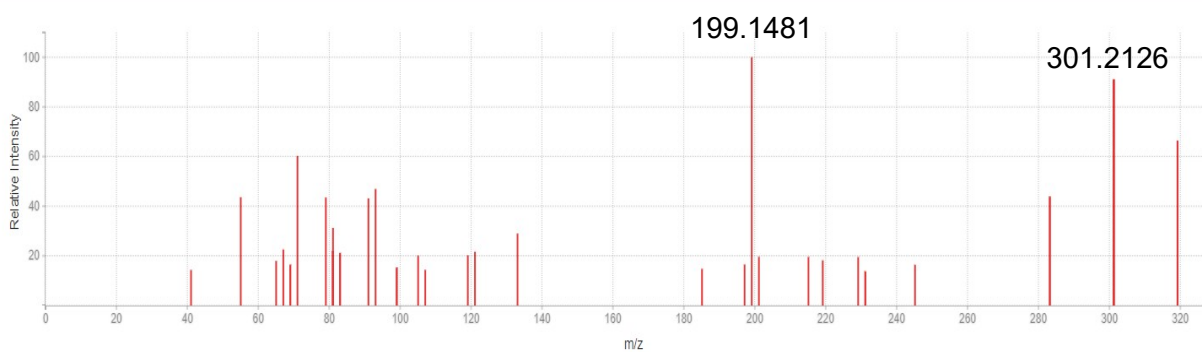

## 6. Histidine

[M+H]: 156.0767

MS/MS spectrum of Histidine detected in mouse serum

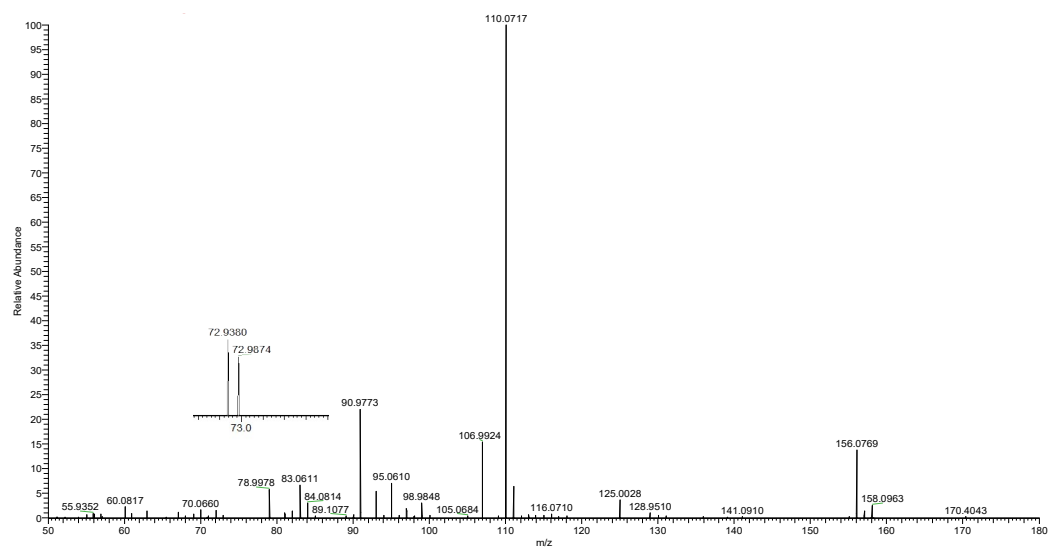

MS/MS spectrum of Histidine from mz cloud

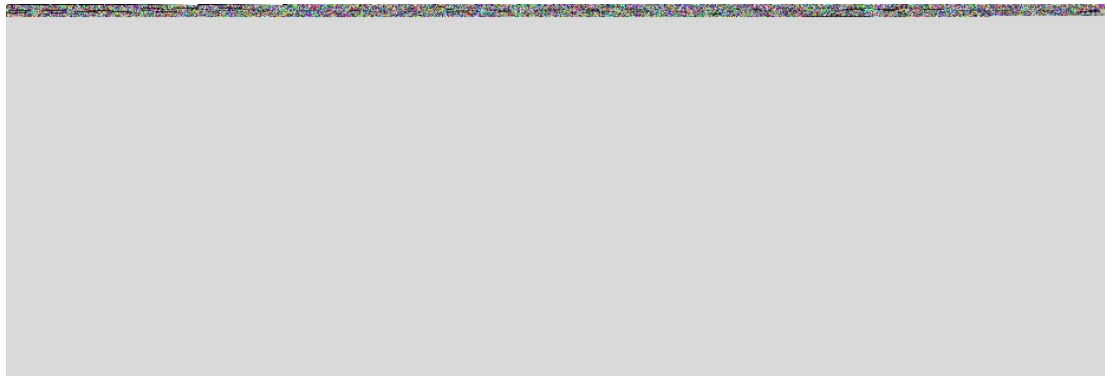

## 7. Histamine

[M+H]: 112.0869

MS/MS spectrum of Histamine detected in mouse serum

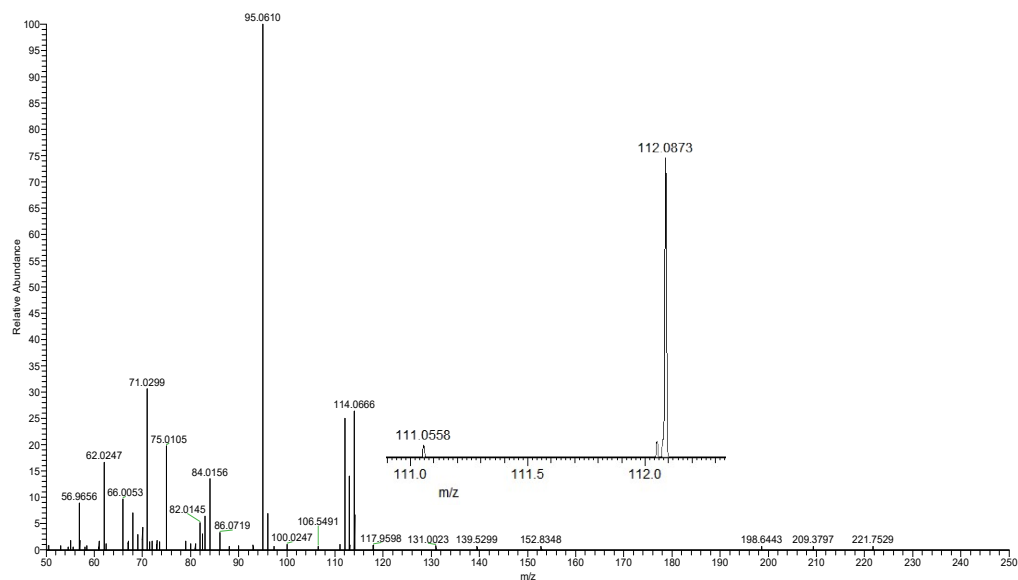

MS/MS spectrum of Histamine from HMDB

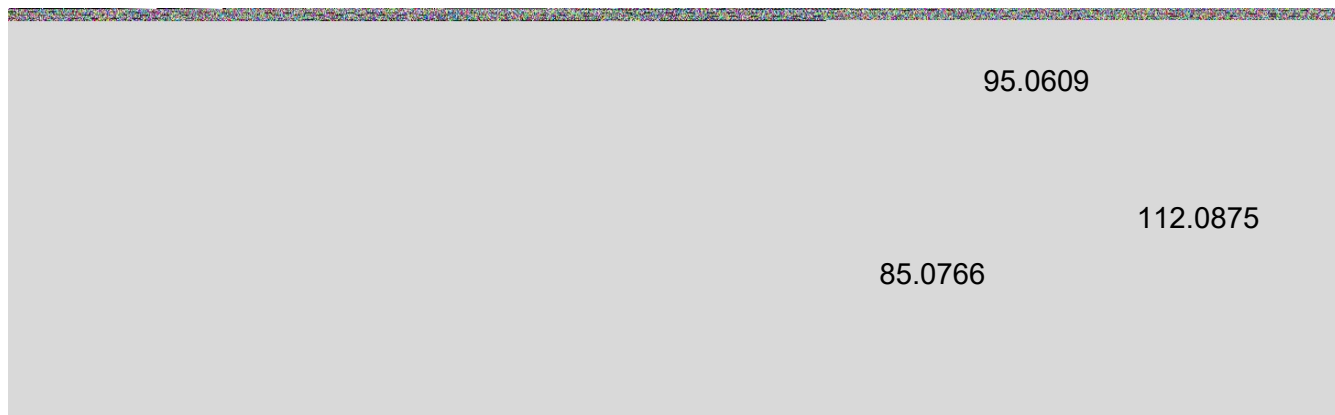

## 8. Arachidonic acid

[M-H]: 303.2329

MS/MS spectrum of Arachidonic acid detected in mouse serum

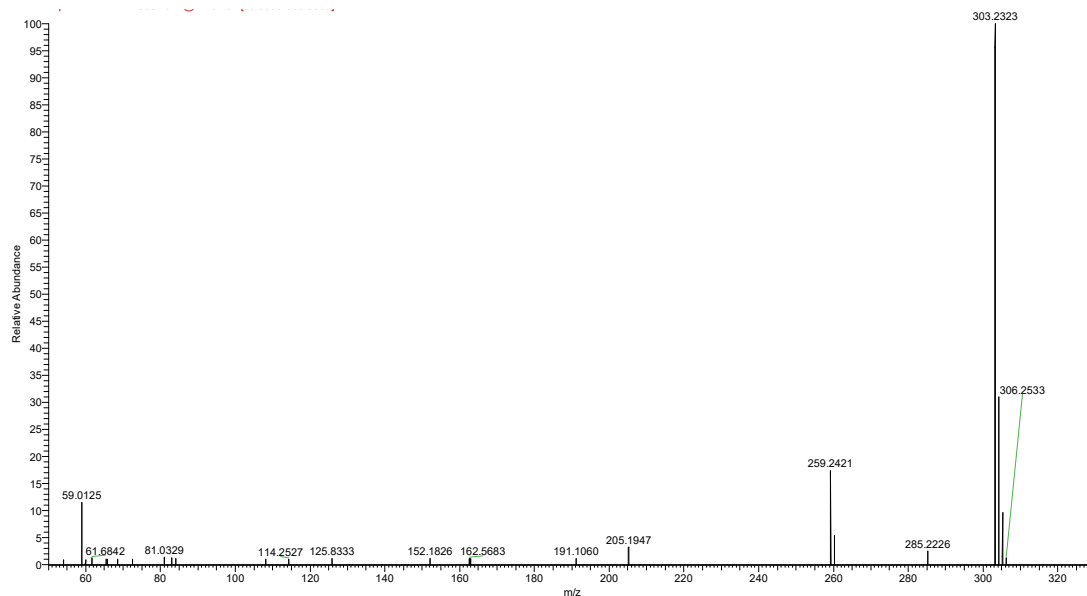

MS/MS spectrum of Arachidonic acid from HMDB

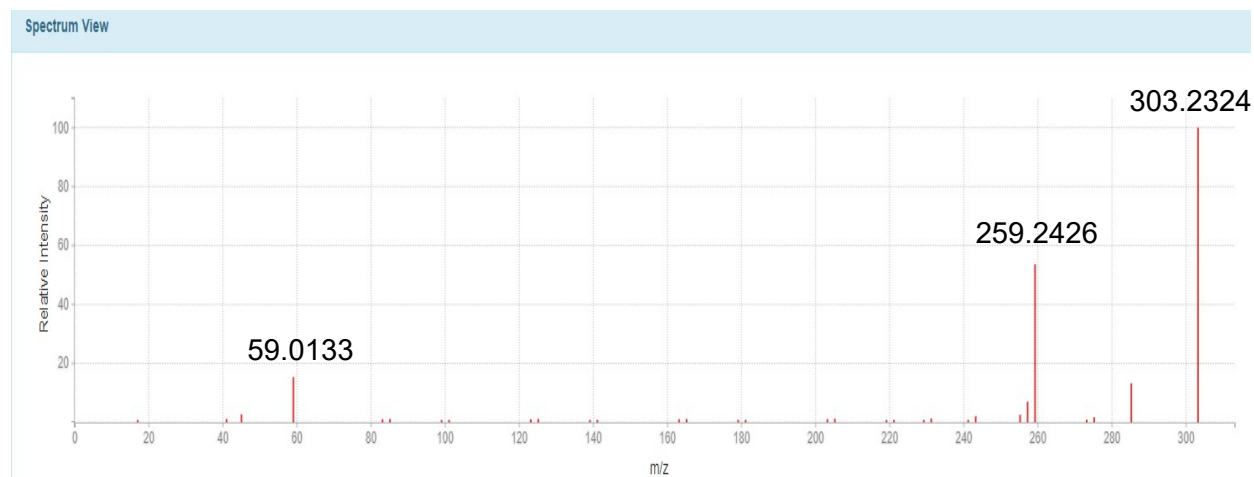

MS/MS spectrum of Arachidonic acid from MassBank

Arachidonic acid; LC-ESI-QTOF; MS2; CE:20 eV; [M-H]-

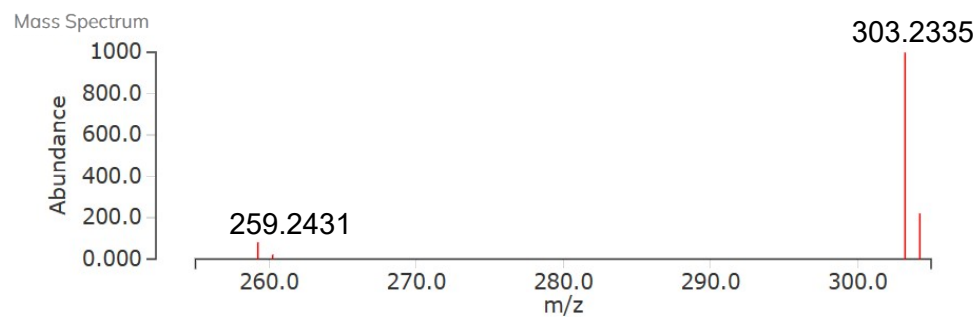

## 9. Uridine

[M-H]: 243.0622

MS/MS spectrum of Uridine detected in mouse serum

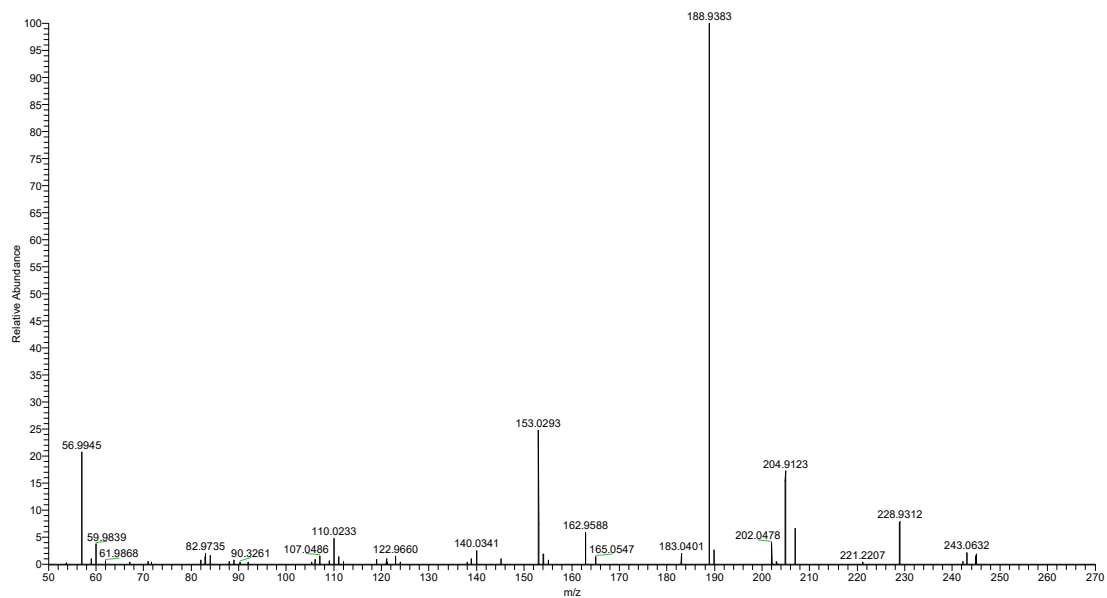

MS/MS spectrum of Uridine from mz cloud

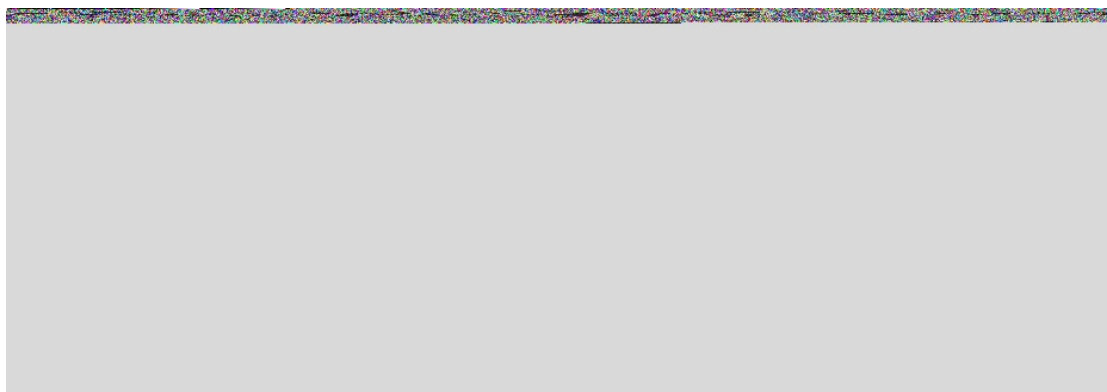

MS/MS spectrum of Uridine from MassBank

Uridine; LC-ESI-QTOF; MS2; CE: 20; R=; [M-H]-

Mass Spectrum

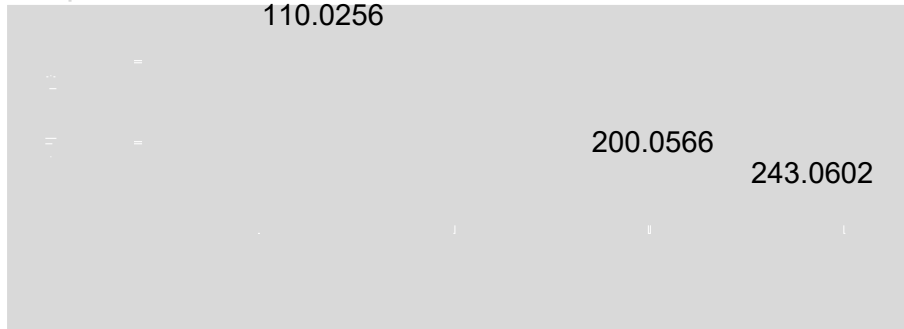

# 10. Xanthine

[M+H]: 153.0407

MS/MS spectrum of Xanthine detected in mouse serum

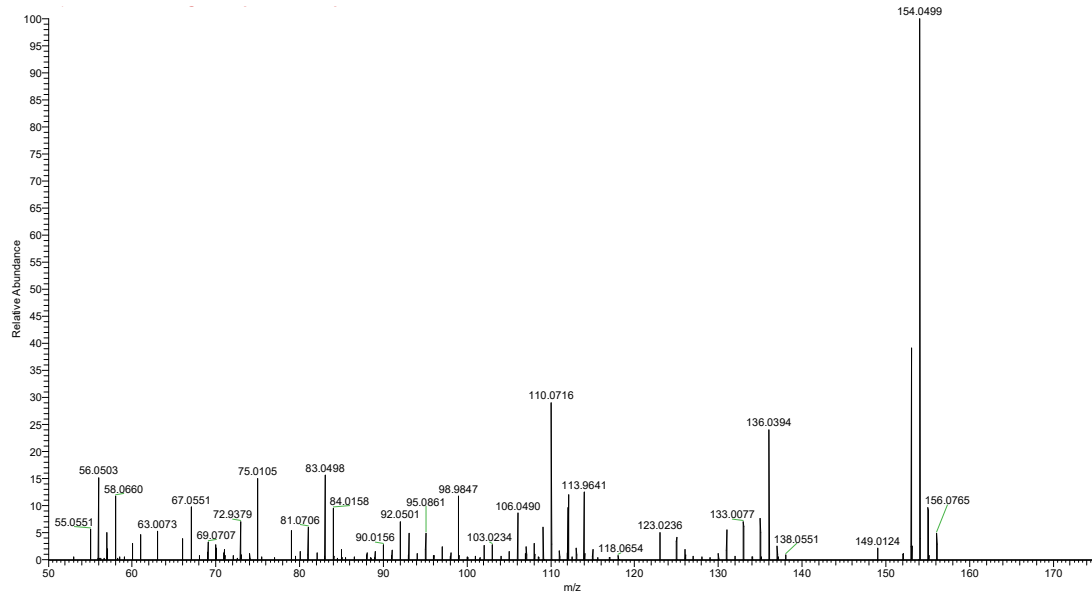

MS/MS spectrum of Xanthine standard

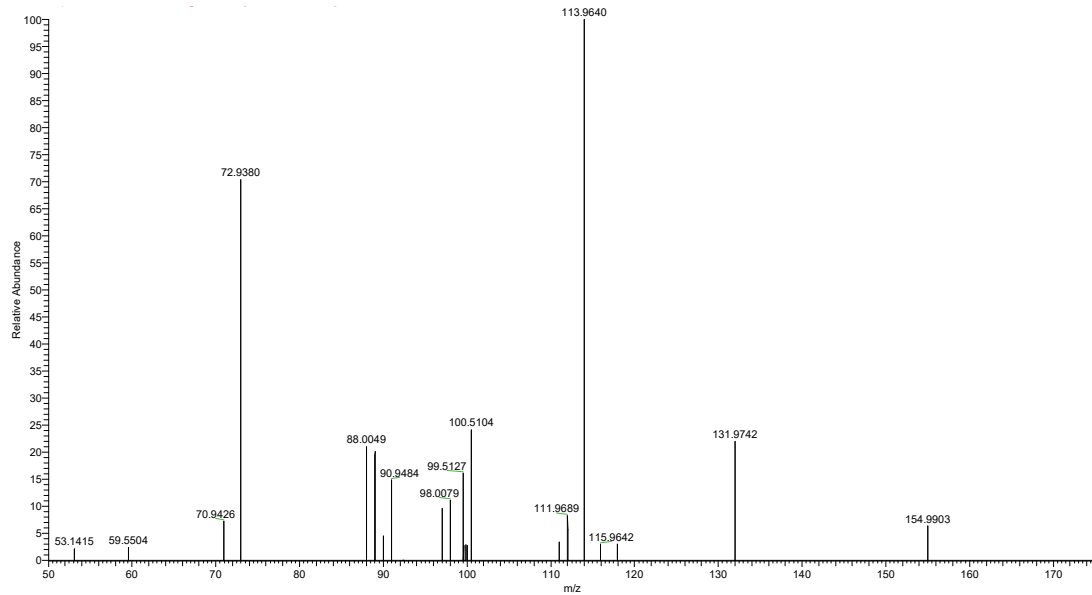



MS/MS spectrum of Xanthine from MassBank

Xanthine; LC-ESI-QTOF; MS2; CE: 20; R=; [M+H]<sup>+</sup>

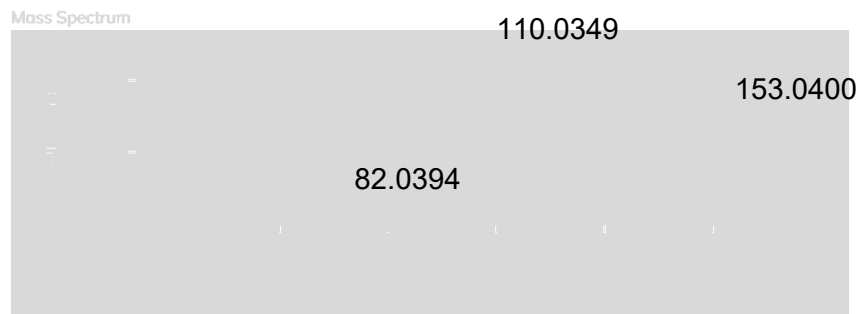

# 11. Tryptophan

[M+H]: 205.0971

MS/MS spectrum of Tryptophan detected in mouse serum

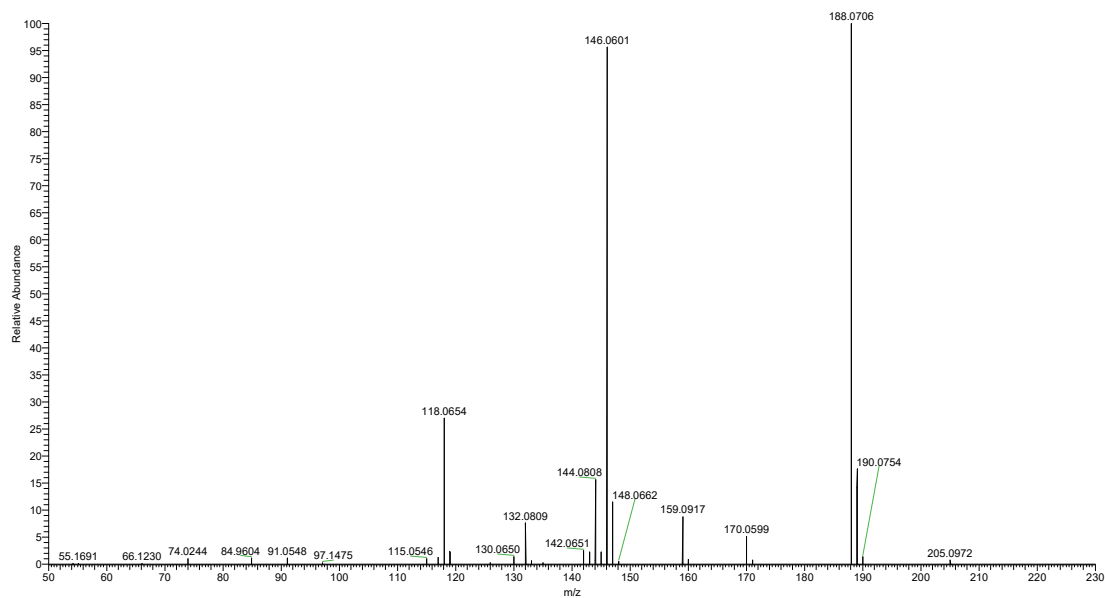

MS/MS spectrum of Tryptophan from mz cloud

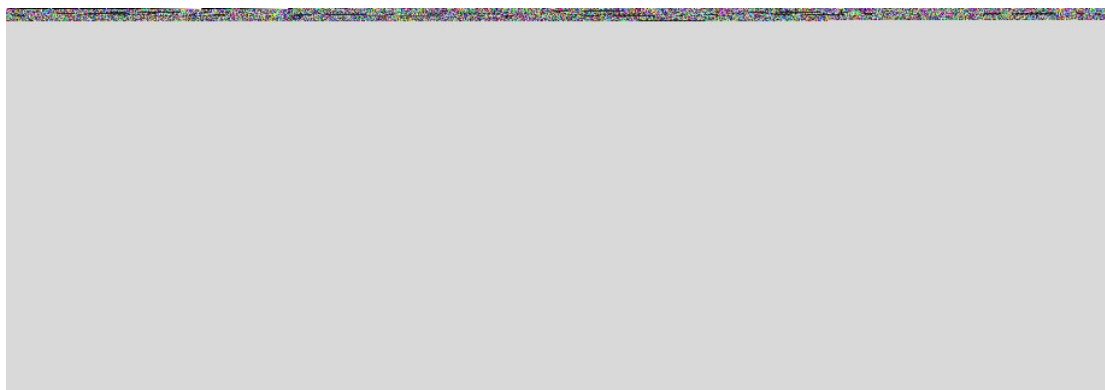

MS/MS spectrum of Tryptophan from MassBank

L-Tryptophan; LC-ESI-QTOF; MS2; CE 10 ev; [M+H]<sup>+</sup>

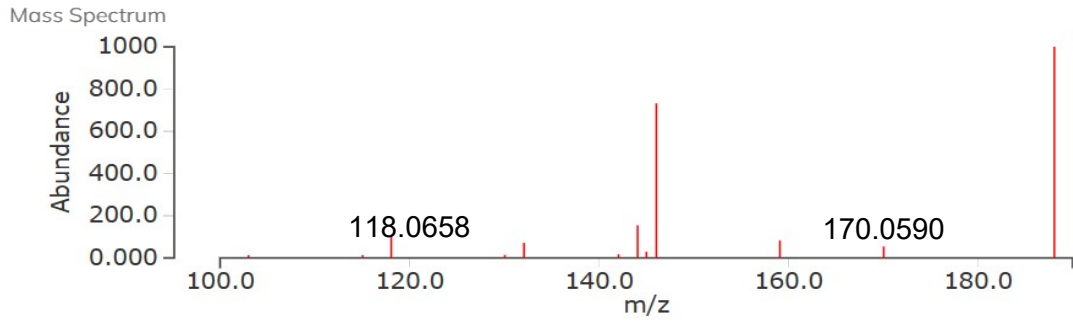

## 12. 5-HPETE

[M+H]: 337.2373

MS/MS spectrum of 5-HPETE detected in mouse serum

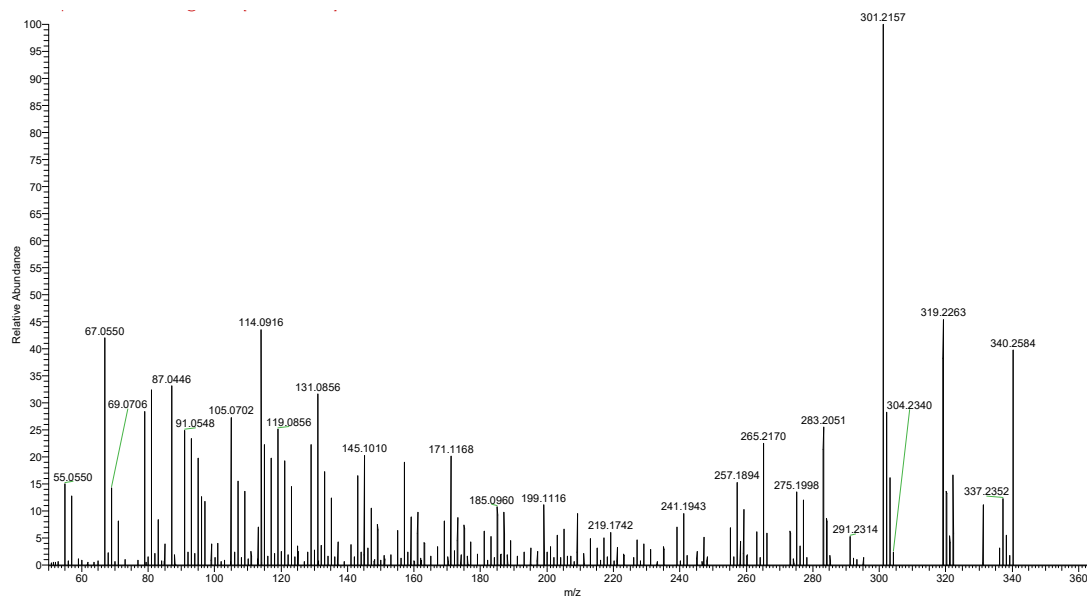

MS/MS spectrum of 5-HPETE from HMDB

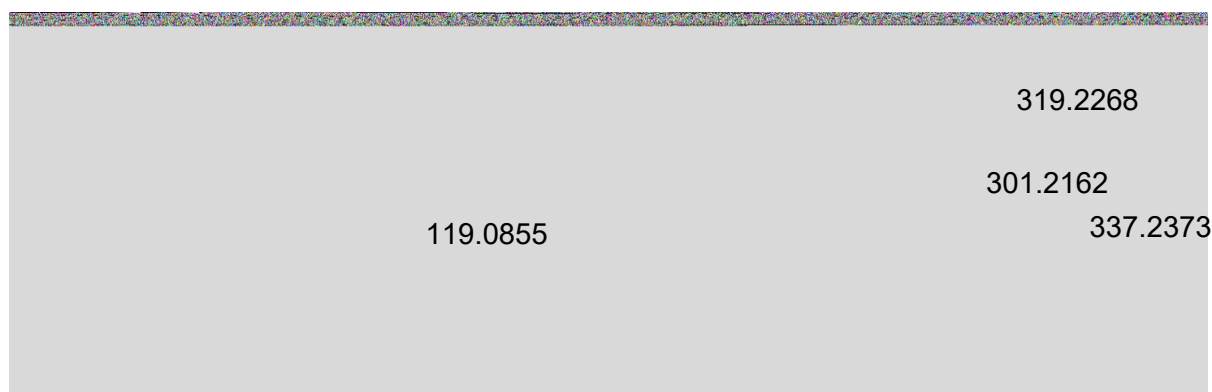

### 13. $\alpha$ -Linolenic acid

[M-H]: 277.2173

MS/MS spectrum of  $\alpha$ -Linolenic acid detected in mouse serum

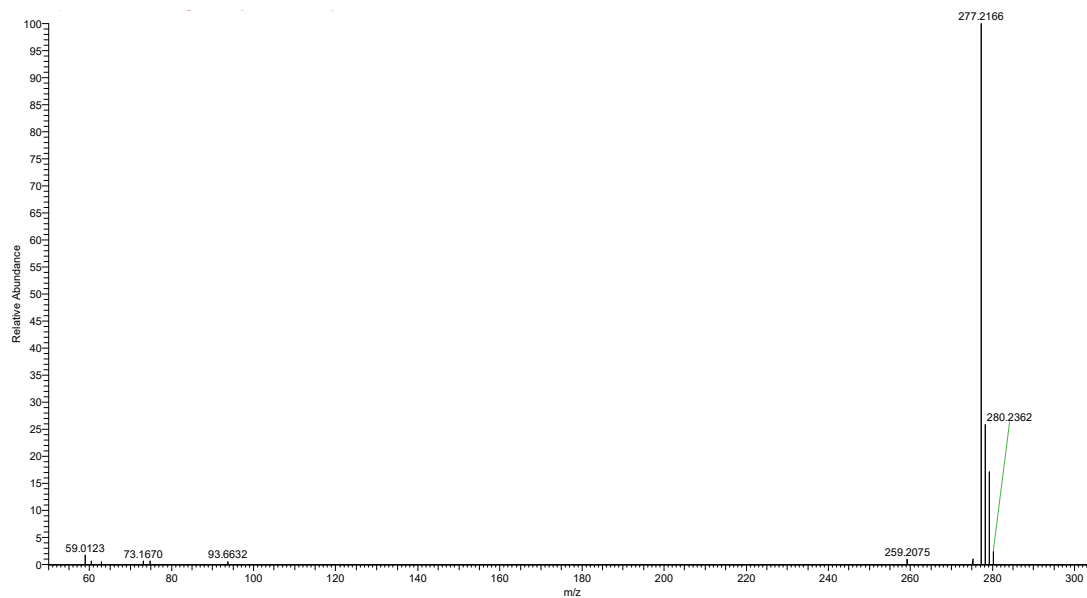

MS/MS spectrum of  $\alpha$ -Linolenic acid from HMDB

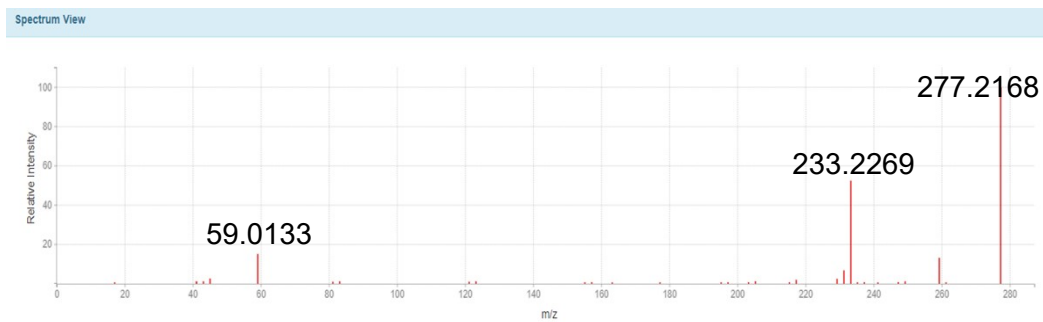

# 14. Linoleic acid

[M-H]: 279.2329

MS/MS spectrum of linoleic acid detected in mouse serum

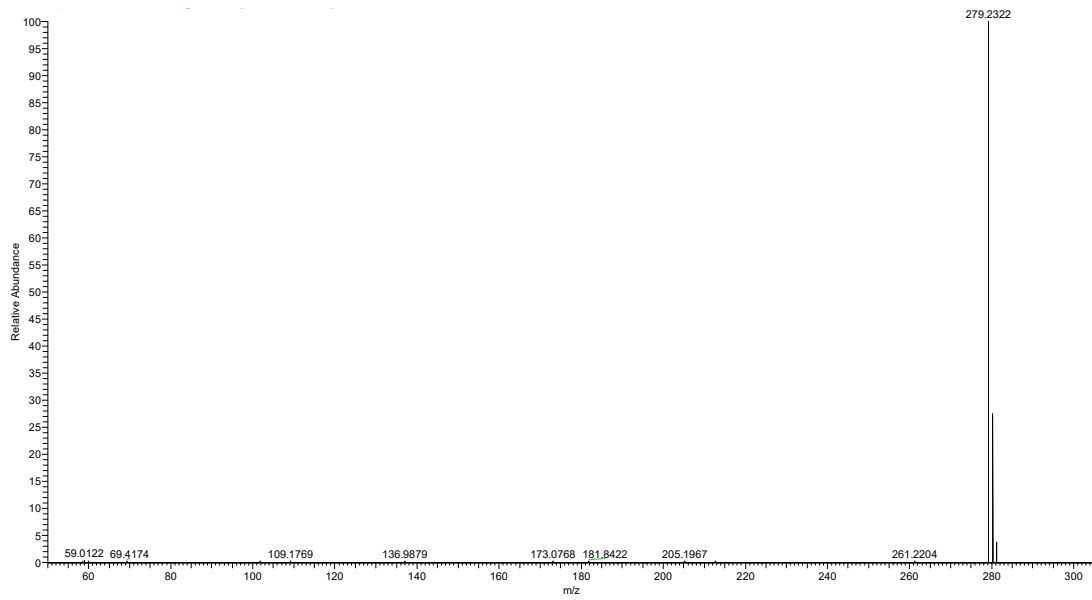

MS/MS spectrum of linoleic acid standard

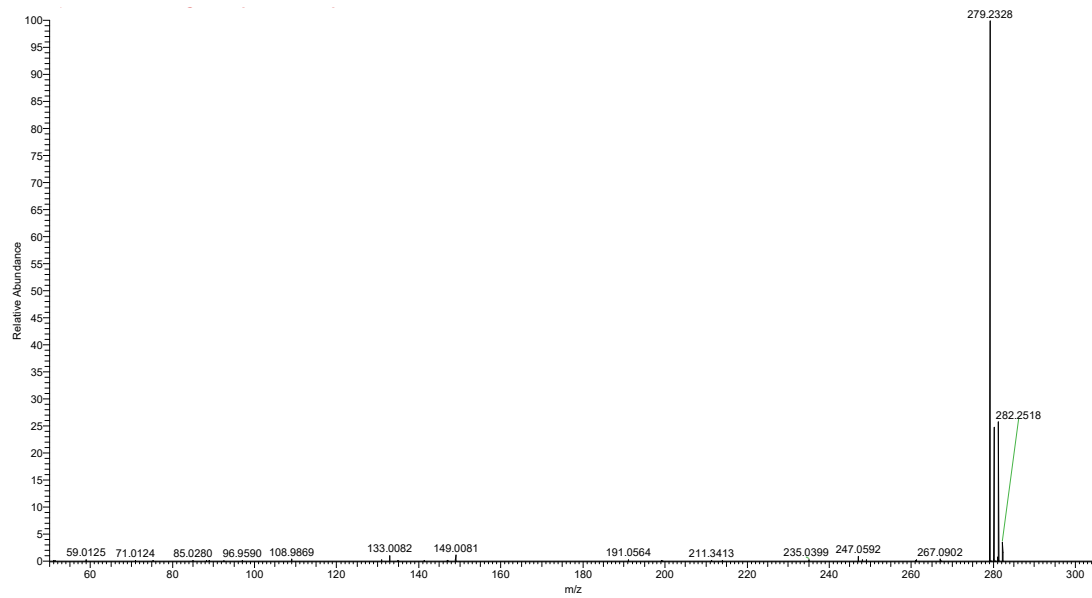

## 15. Valine

[M+H]: 118.0863

MS/MS spectrum of Valine detected in mouse serum

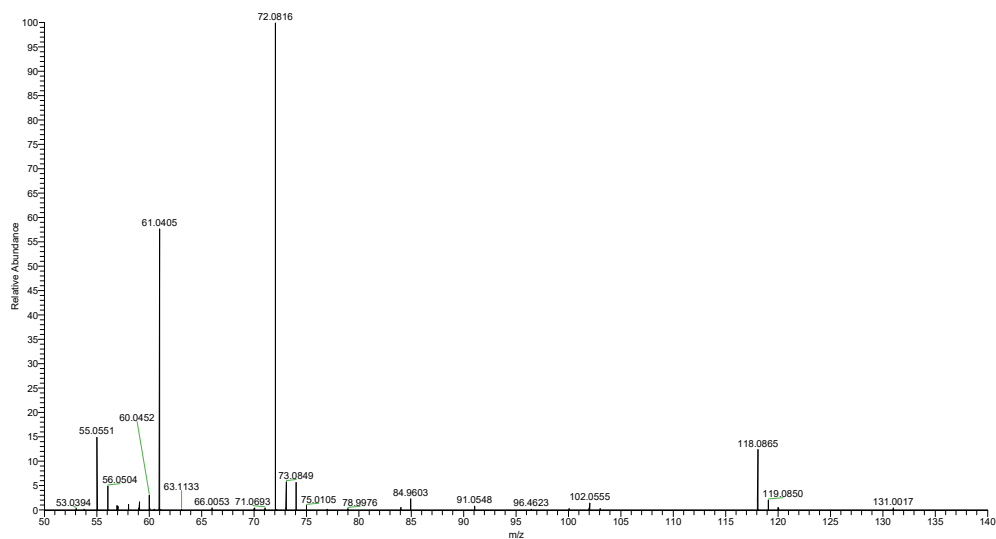

MS/MS spectrum of Valine from HMDB

Spectrum View

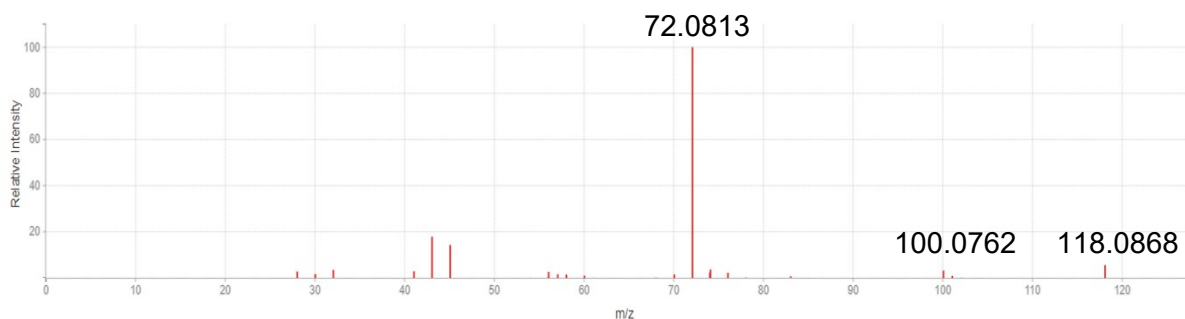

Supplement: d3fo04078j1.pdf [file d3fo04078j1.pdf]
